# Supplementary material
Source: MDPI journal article supplement (https://www.mdpi.com/2075-163X/12/5/527)
Supplement: s1 [file s1]

# Apatite, $\text{Ca}_5(\text{PO}_4)_3(\text{OH}, \text{F}, \text{Cl})$ : Structural Variations, Natural Solid Solutions, Intergrowths, and Zoning

**Table S1.** Chemical compositions for 33 apatite samples with general formula close to  $\text{Ca}_{10}(\text{PO}_4)_6\text{X}_2$ .

|                         |             | 1      | 2      | 3      | 4a     | 4b     | 5      | 6L     | 6D     | 7      | 8      |
|-------------------------|-------------|--------|--------|--------|--------|--------|--------|--------|--------|--------|--------|
| $\text{P}_2\text{O}_5$  | wt. %       | 41.59  | 42.40  | 42.06  | 41.75  | 40.68  | 42.57  | 41.54  | 41.57  | 41.66  | 41.52  |
| $\text{SiO}_2$          |             | 0.00   | 0.00   | 0.00   | 0.00   | 0.00   | 0.00   | 0.00   | 0.00   | 0.00   | 0.00   |
| $\text{SO}_3$           |             | 0.05   | 0.00   | 0.02   | 0.05   | 0.00   | 0.08   | 0.00   | 0.00   | 0.13   | 0.00   |
| $\text{FeO}$            |             | 0.71   | 0.02   | 0.03   | 0.00   | 0.00   | 0.03   | 0.05   | 0.05   | 0.00   | 0.04   |
| $\text{MnO}$            |             | 3.20   | 1.99   | 1.83   | 1.14   | 0.43   | 0.20   | 0.55   | 0.27   | 0.16   | 0.89   |
| $\text{MgO}$            |             | 0.00   | 0.00   | 0.02   | 0.01   | 0.01   | 0.02   | 0.02   | 0.00   | 0.00   | 0.00   |
| $\text{CaO}$            |             | 51.20  | 53.95  | 53.49  | 54.74  | 55.80  | 55.92  | 55.24  | 55.87  | 55.73  | 54.80  |
| $\text{SrO}$            |             | 0.00   | 0.56   | 0.79   | 0.00   | 0.00   | 0.00   | 0.25   | 0.00   | 0.00   | 0.48   |
| $\text{PbO}$            |             | 0.00   | 0.00   | 0.00   | 0.00   | 0.00   | 0.00   | 0.00   | 0.00   | 0.00   | 0.00   |
| $\text{La}_2\text{O}_3$ |             | 0.00   | 0.00   | 0.00   | 0.00   | 0.00   | 0.00   | 0.00   | 0.00   | 0.00   | 0.00   |
| $\text{Nd}_2\text{O}_3$ |             | 0.00   | 0.03   | 0.01   | 0.00   | 0.00   | 0.00   | 0.00   | 0.00   | 0.00   | 0.00   |
| $\text{Pr}_2\text{O}_3$ |             | 0.00   | 0.00   | 0.00   | 0.00   | 0.00   | 0.00   | 0.00   | 0.00   | 0.00   | 0.00   |
| $\text{Sm}_2\text{O}_3$ |             | 0.00   | 0.00   | 0.00   | 0.00   | 0.00   | 0.00   | 0.00   | 0.00   | 0.00   | 0.00   |
| $\text{Ce}_2\text{O}_3$ |             | 0.00   | 0.02   | 0.00   | 0.00   | 0.00   | 0.00   | 0.00   | 0.00   | 0.00   | 0.00   |
| $\text{Y}_2\text{O}_3$  |             | 0.00   | 0.00   | 0.00   | 0.00   | 0.00   | 0.00   | 0.00   | 0.00   | 0.00   | 0.00   |
| $\text{Fe}_2\text{O}_3$ |             | 0.00   | 0.00   | 0.00   | 0.00   | 0.00   | 0.00   | 0.00   | 0.00   | 0.00   | 0.00   |
| $\text{Na}_2\text{O}$   |             | 0.07   | 0.02   | 0.01   | 0.01   | 0.02   | 0.00   | 0.00   | 0.02   | 0.11   | 0.05   |
| F                       |             | 3.68   | 3.15   | 3.10   | 3.77   | 3.80   | 3.73   | 3.76   | 3.81   | 3.76   | 3.75   |
| Cl                      |             | 0.02   | 0.00   | 0.01   | 0.00   | 0.02   | 0.03   | 0.06   | 0.00   | 0.07   | 0.06   |
| OH                      |             | 0.00   | 0.30   | 0.31   | 0.00   | 0.00   | 0.03   | 0.00   | 0.00   | 0.00   | 0.00   |
| $\Sigma$                |             | 100.52 | 102.44 | 101.68 | 101.47 | 100.76 | 102.61 | 101.46 | 101.59 | 101.62 | 101.59 |
| O = F, Cl               |             | -1.55  | -1.33  | -1.31  | -1.59  | -1.60  | -1.58  | -1.59  | -1.60  | -1.60  | -1.59  |
| <b>Total</b>            |             | 98.96  | 101.12 | 100.37 | 99.89  | 99.16  | 101.03 | 99.87  | 99.98  | 100.02 | 100.00 |
| P                       | <i>apfu</i> | 6.040  | 5.994  | 5.995  | 5.926  | 5.719  | 5.993  | 5.874  | 5.849  | 5.872  | 5.870  |
| Si                      |             | 0.000  | 0.000  | 0.000  | 0.000  | 0.000  | 0.000  | 0.000  | 0.000  | 0.000  | 0.000  |
| S                       |             | 0.006  | 0.000  | 0.003  | 0.006  | 0.000  | 0.010  | 0.000  | 0.000  | 0.016  | 0.000  |
| $\Sigma\text{P}$        |             | 6.046  | 5.994  | 5.997  | 5.931  | 5.719  | 6.003  | 5.874  | 5.849  | 5.888  | 5.870  |
| Fe                      |             | 0.102  | 0.003  | 0.004  | 0.000  | 0.000  | 0.004  | 0.007  | 0.007  | 0.000  | 0.006  |
| Mn                      |             | 0.465  | 0.281  | 0.261  | 0.162  | 0.061  | 0.028  | 0.078  | 0.038  | 0.023  | 0.126  |
| Mg                      |             | 0.000  | 0.000  | 0.005  | 0.002  | 0.003  | 0.005  | 0.005  | 0.000  | 0.000  | 0.000  |
| Ca                      |             | 9.410  | 9.652  | 9.649  | 9.833  | 9.929  | 9.963  | 9.886  | 9.949  | 9.942  | 9.806  |
| Sr                      |             | 0.000  | 0.054  | 0.077  | 0.000  | 0.000  | 0.000  | 0.024  | 0.000  | 0.000  | 0.046  |
| Pb                      |             | 0.000  | 0.000  | 0.000  | 0.000  | 0.000  | 0.000  | 0.000  | 0.000  | 0.000  | 0.000  |
| La                      |             | 0.000  | 0.000  | 0.000  | 0.000  | 0.000  | 0.000  | 0.000  | 0.000  | 0.000  | 0.000  |
| Nd                      |             | 0.000  | 0.002  | 0.001  | 0.000  | 0.000  | 0.000  | 0.000  | 0.000  | 0.000  | 0.000  |
| Pr                      |             | 0.000  | 0.000  | 0.000  | 0.000  | 0.000  | 0.000  | 0.000  | 0.000  | 0.000  | 0.000  |
| Sm                      |             | 0.000  | 0.000  | 0.000  | 0.000  | 0.000  | 0.000  | 0.000  | 0.000  | 0.000  | 0.000  |
| Ce                      |             | 0.000  | 0.001  | 0.000  | 0.000  | 0.000  | 0.000  | 0.000  | 0.000  | 0.000  | 0.000  |
| Y                       |             | 0.000  | 0.000  | 0.000  | 0.000  | 0.000  | 0.000  | 0.000  | 0.000  | 0.000  | 0.000  |
| Na                      |             | 0.023  | 0.006  | 0.003  | 0.003  | 0.007  | 0.000  | 0.000  | 0.006  | 0.036  | 0.016  |
| $\Sigma\text{M}$        |             | 10.00  | 10.00  | 10.00  | 10.00  | 10.00  | 10.00  | 10.00  | 10.00  | 10.00  | 10.00  |
| F                       |             | 1.995  | 1.663  | 1.651  | 2.000  | 1.993  | 1.961  | 1.984  | 2.000  | 1.980  | 1.983  |
| Cl                      |             | 0.005  | 0.000  | 0.003  | 0.000  | 0.007  | 0.008  | 0.016  | 0.000  | 0.020  | 0.017  |
| OH                      |             | 0.000  | 0.336  | 0.347  | 0.000  | 0.000  | 0.030  | 0.000  | 0.000  | 0.000  | 0.000  |
| $\Sigma\text{X}$        |             | 2.000  | 2.000  | 2.000  | 2.000  | 2.000  | 2.000  | 2.000  | 2.000  | 2.000  | 2.000  |

The *apfu* are based on 10 M cations. OH was calculated by assuming  $\text{OH} = 2 - (\text{F} + \text{Cl})$ .  $\text{ThO}_2$  was below detection limit.

Table S1. Continued.

|                                |             | 9      | 10     | 11     | 12     | 13     | 14    | 15     | 16    | 17     | 18     |
|--------------------------------|-------------|--------|--------|--------|--------|--------|-------|--------|-------|--------|--------|
| P <sub>2</sub> O <sub>5</sub>  | wt. %       | 41.96  | 41.37  | 42.33  | 41.57  | 42.12  | 41.05 | 41.70  | 40.76 | 40.18  | 41.03  |
| SiO <sub>2</sub>               |             | 0.00   | 0.00   | 0.01   | 0.00   | 0.00   | 0.00  | 0.00   | 0.00  | 0.30   | 0.00   |
| SO <sub>3</sub>                |             | 0.03   | 0.13   | 0.08   | 0.32   | 0.00   | 0.37  | 0.00   | 0.42  | 1.07   | 0.86   |
| FeO                            |             | 0.01   | 0.01   | 0.04   | 0.04   | 0.00   | 0.02  | 0.00   | 0.05  | 0.00   | 0.03   |
| MnO                            |             | 1.95   | 0.01   | 0.08   | 0.03   | 0.00   | 0.02  | 0.00   | 0.02  | 0.00   | 0.00   |
| MgO                            |             | 0.00   | 0.00   | 0.00   | 0.01   | 0.01   | 0.00  | 0.00   | 0.00  | 0.00   | 0.01   |
| CaO                            |             | 54.41  | 56.26  | 54.99  | 55.41  | 55.44  | 54.45 | 54.82  | 54.09 | 55.49  | 55.00  |
| SrO                            |             | 0.08   | 0.00   | 0.11   | 0.17   | 0.00   | 0.00  | 0.08   | 0.03  | 0.00   | 0.00   |
| PbO                            |             | 0.00   | 0.00   | 0.00   | 0.00   | 0.00   | 0.00  | 0.08   | 0.00  | 0.00   | 0.02   |
| La <sub>2</sub> O <sub>3</sub> |             | 0.00   | 0.00   | 0.17   | 0.00   | 0.01   | 0.00  | 0.00   | 0.00  | 0.00   | 0.00   |
| Nd <sub>2</sub> O <sub>3</sub> |             | 0.00   | 0.00   | 0.21   | 0.00   | 0.00   | 0.00  | 0.00   | 0.00  | 0.00   | 0.00   |
| Pr <sub>2</sub> O <sub>3</sub> |             | 0.00   | 0.00   | 0.03   | 0.00   | 0.00   | 0.00  | 0.00   | 0.00  | 0.00   | 0.00   |
| Sm <sub>2</sub> O <sub>3</sub> |             | 0.00   | 0.00   | 0.03   | 0.00   | 0.00   | 0.00  | 0.00   | 0.00  | 0.00   | 0.00   |
| Ce <sub>2</sub> O <sub>3</sub> |             | 0.00   | 0.00   | 0.49   | 0.00   | 0.04   | 0.00  | 0.00   | 0.00  | 0.00   | 0.00   |
| Y <sub>2</sub> O <sub>3</sub>  |             | 0.00   | 0.00   | 0.12   | 0.00   | 0.00   | 0.00  | 0.00   | 0.00  | 0.00   | 0.00   |
| Fe <sub>2</sub> O <sub>3</sub> |             | 0.00   | 0.00   | 0.00   | 0.00   | 0.00   | 0.00  | 0.00   | 0.00  | 0.00   | 0.00   |
| Na <sub>2</sub> O              |             | 0.01   | 0.01   | 0.19   | 0.09   | 0.00   | 0.00  | 0.00   | 0.00  | 0.19   | 0.00   |
| F                              |             | 3.66   | 3.72   | 3.78   | 3.78   | 3.67   | 3.48  | 3.68   | 3.66  | 3.60   | 3.51   |
| Cl                             |             | 0.01   | 0.00   | 0.01   | 0.00   | 0.02   | 0.40  | 0.00   | 0.02  | 0.06   | 0.41   |
| OH                             |             | 0.06   | 0.04   | 0.00   | 0.00   | 0.04   | 0.00  | 0.02   | 0.00  | 0.07   | 0.00   |
| Σ                              |             | 102.18 | 101.55 | 102.67 | 101.42 | 101.35 | 99.79 | 100.38 | 99.05 | 100.96 | 100.87 |
| O = F, Cl                      |             | -1.54  | -1.57  | -1.59  | -1.59  | -1.55  | -1.55 | -1.55  | -1.55 | -1.53  | -1.57  |
| <b>Total</b>                   |             | 100.64 | 99.98  | 101.08 | 99.83  | 99.80  | 98.23 | 98.83  | 97.50 | 99.43  | 99.30  |
| P                              | <i>apfu</i> | 5.917  | 5.807  | 5.987  | 5.893  | 6.000  | 5.953 | 6.003  | 5.946 | 5.686  | 5.890  |
| Si                             |             | 0.000  | 0.000  | 0.002  | 0.000  | 0.000  | 0.000 | 0.000  | 0.000 | 0.050  | 0.000  |
| S                              |             | 0.003  | 0.016  | 0.010  | 0.040  | 0.000  | 0.048 | 0.000  | 0.054 | 0.134  | 0.109  |
| <b>ΣP</b>                      |             | 5.921  | 5.823  | 5.999  | 5.934  | 6.000  | 6.001 | 6.003  | 6.001 | 5.870  | 5.999  |
| Fe                             |             | 0.001  | 0.001  | 0.006  | 0.006  | 0.000  | 0.003 | 0.000  | 0.007 | 0.000  | 0.004  |
| Mn                             |             | 0.275  | 0.001  | 0.011  | 0.004  | 0.000  | 0.003 | 0.000  | 0.003 | 0.000  | 0.000  |
| Mg                             |             | 0.000  | 0.000  | 0.000  | 0.002  | 0.003  | 0.000 | 0.000  | 0.000 | 0.000  | 0.003  |
| Ca                             |             | 9.711  | 9.994  | 9.844  | 9.942  | 9.994  | 9.994 | 9.988  | 9.987 | 9.938  | 9.992  |
| Sr                             |             | 0.008  | 0.000  | 0.011  | 0.017  | 0.000  | 0.000 | 0.008  | 0.003 | 0.000  | 0.000  |
| Pb                             |             | 0.000  | 0.000  | 0.000  | 0.000  | 0.000  | 0.000 | 0.004  | 0.000 | 0.000  | 0.001  |
| La                             |             | 0.000  | 0.000  | 0.010  | 0.000  | 0.001  | 0.000 | 0.000  | 0.000 | 0.000  | 0.000  |
| Nd                             |             | 0.000  | 0.000  | 0.013  | 0.000  | 0.000  | 0.000 | 0.000  | 0.000 | 0.000  | 0.000  |
| Pr                             |             | 0.000  | 0.000  | 0.002  | 0.000  | 0.000  | 0.000 | 0.000  | 0.000 | 0.000  | 0.000  |
| Sm                             |             | 0.000  | 0.000  | 0.002  | 0.000  | 0.000  | 0.000 | 0.000  | 0.000 | 0.000  | 0.000  |
| Ce                             |             | 0.000  | 0.000  | 0.030  | 0.000  | 0.002  | 0.000 | 0.000  | 0.000 | 0.000  | 0.000  |
| Y                              |             | 0.000  | 0.000  | 0.011  | 0.000  | 0.000  | 0.000 | 0.000  | 0.000 | 0.000  | 0.000  |
| Na                             |             | 0.004  | 0.005  | 0.062  | 0.029  | 0.000  | 0.000 | 0.000  | 0.000 | 0.062  | 0.000  |
| <b>ΣM</b>                      |             | 10.00  | 10.00  | 10.00  | 10.00  | 10.00  | 10.00 | 10.00  | 10.00 | 10.00  | 10.00  |
| F                              |             | 1.927  | 1.953  | 1.997  | 2.000  | 1.953  | 1.884 | 1.979  | 1.995 | 1.903  | 1.882  |
| Cl                             |             | 0.004  | 0.000  | 0.003  | 0.000  | 0.006  | 0.116 | 0.000  | 0.006 | 0.017  | 0.118  |
| OH                             |             | 0.070  | 0.047  | 0.000  | 0.000  | 0.042  | 0.000 | 0.020  | 0.000 | 0.080  | 0.000  |
| <b>ΣX</b>                      |             | 2.000  | 2.000  | 2.000  | 2.000  | 2.000  | 2.000 | 2.000  | 2.000 | 2.000  | 2.000  |

|                                |       | 19     | 20     | 21     | 22     | 23     | 24     | 25    | 26     | 27     | 28     |
|--------------------------------|-------|--------|--------|--------|--------|--------|--------|-------|--------|--------|--------|
| P <sub>2</sub> O <sub>5</sub>  | wt. % | 41.92  | 40.38  | 41.60  | 40.91  | 40.81  | 39.85  | 41.05 | 41.60  | 41.01  | 41.29  |
| SiO <sub>2</sub>               |       | 0.08   | 0.26   | 0.00   | 0.72   | 0.38   | 0.62   | 0.00  | 0.05   | 0.00   | 0.00   |
| SO <sub>3</sub>                |       | 0.34   | 0.94   | 0.10   | 0.90   | 0.29   | 0.86   | 0.37  | 0.00   | 0.37   | 0.11   |
| FeO                            |       | 0.04   | 0.04   | 0.05   | 0.00   | 0.00   | 0.00   | 0.02  | 0.04   | 0.02   | 0.04   |
| MnO                            |       | 0.00   | 0.01   | 0.00   | 0.00   | 0.01   | 0.02   | 0.02  | 0.01   | 0.03   | 0.03   |
| MgO                            |       | 0.03   | 0.04   | 0.00   | 0.01   | 0.00   | 0.01   | 0.00  | 0.01   | 0.03   | 0.00   |
| CaO                            |       | 55.25  | 54.21  | 54.85  | 55.88  | 55.54  | 55.75  | 54.45 | 54.67  | 55.45  | 55.10  |
| SrO                            |       | 0.31   | 0.00   | 0.00   | 0.04   | 0.07   | 0.02   | 0.00  | 0.06   | 0.00   | 0.41   |
| PbO                            |       | 0.00   | 0.00   | 0.00   | 0.00   | 0.00   | 0.00   | 0.00  | 0.00   | 0.00   | 0.00   |
| La <sub>2</sub> O <sub>3</sub> |       | 0.00   | 0.00   | 0.00   | 0.00   | 0.18   | 0.00   | 0.00  | 0.38   | 0.00   | 0.00   |
| Nd <sub>2</sub> O <sub>3</sub> |       | 0.09   | 0.00   | 0.00   | 0.00   | 0.06   | 0.07   | 0.00  | 0.14   | 0.00   | 0.00   |
| Pr <sub>2</sub> O <sub>3</sub> |       | 0.00   | 0.00   | 0.00   | 0.00   | 0.00   | 0.00   | 0.00  | 0.00   | 0.00   | 0.00   |
| Sm <sub>2</sub> O <sub>3</sub> |       | 0.00   | 0.00   | 0.00   | 0.00   | 0.00   | 0.00   | 0.00  | 0.00   | 0.00   | 0.00   |
| Ce <sub>2</sub> O <sub>3</sub> |       | 0.05   | 0.00   | 0.00   | 0.03   | 0.34   | 0.08   | 0.00  | 0.46   | 0.00   | 0.00   |
| Y <sub>2</sub> O <sub>3</sub>  |       | 0.00   | 0.00   | 0.00   | 0.00   | 0.01   | 0.00   | 0.00  | 0.07   | 0.00   | 0.00   |
| Fe <sub>2</sub> O <sub>3</sub> |       | 0.00   | 0.00   | 0.00   | 0.00   | 0.00   | 0.00   | 0.00  | 0.00   | 0.00   | 0.00   |
| Na <sub>2</sub> O              |       | 0.10   | 0.45   | 0.00   | 0.08   | 0.07   | 0.01   | 0.00  | 0.15   | 0.13   | 0.04   |
| F                              |       | 2.82   | 3.46   | 3.51   | 3.00   | 2.73   | 2.54   | 3.48  | 2.32   | 3.45   | 3.48   |
| Cl                             |       | 0.17   | 0.52   | 0.40   | 0.06   | 0.43   | 0.09   | 0.40  | 0.62   | 0.61   | 0.52   |
| OH                             |       | 0.41   | 0.00   | 0.00   | 0.36   | 0.39   | 0.57   | 0.00  | 0.52   | 0.00   | 0.00   |
| Σ                              |       | 101.61 | 100.30 | 100.50 | 101.99 | 101.31 | 100.46 | 99.79 | 101.12 | 101.10 | 101.02 |
| O = F, Cl                      |       | -1.23  | -1.57  | -1.57  | -1.28  | -1.25  | -1.09  | -1.55 | -1.12  | -1.59  | -1.58  |
| <b>Total</b>                   |       | 100.38 | 98.73  | 98.94  | 100.72 | 100.06 | 99.37  | 98.23 | 100.00 | 99.51  | 99.44  |
| P                              | apfu  | 5.945  | 5.788  | 5.988  | 5.765  | 5.766  | 5.639  | 5.953 | 5.933  | 5.811  | 5.884  |
| Si                             |       | 0.013  | 0.044  | 0.000  | 0.120  | 0.063  | 0.103  | 0.000 | 0.008  | 0.000  | 0.000  |
| S                              |       | 0.043  | 0.119  | 0.013  | 0.112  | 0.037  | 0.107  | 0.048 | 0.000  | 0.046  | 0.014  |
| <b>ΣP</b>                      |       | 6.001  | 5.952  | 6.001  | 5.997  | 5.866  | 5.849  | 6.001 | 5.941  | 5.857  | 5.898  |
| Fe                             |       | 0.006  | 0.006  | 0.007  | 0.000  | 0.000  | 0.000  | 0.003 | 0.006  | 0.003  | 0.006  |
| Mn                             |       | 0.000  | 0.001  | 0.000  | 0.000  | 0.001  | 0.002  | 0.003 | 0.002  | 0.004  | 0.004  |
| Mg                             |       | 0.007  | 0.010  | 0.000  | 0.002  | 0.001  | 0.002  | 0.000 | 0.003  | 0.007  | 0.000  |
| Ca                             |       | 9.916  | 9.835  | 9.993  | 9.966  | 9.933  | 9.984  | 9.994 | 9.868  | 9.943  | 9.937  |
| Sr                             |       | 0.030  | 0.000  | 0.000  | 0.004  | 0.007  | 0.001  | 0.000 | 0.006  | 0.000  | 0.040  |
| Pb                             |       | 0.000  | 0.000  | 0.000  | 0.000  | 0.000  | 0.000  | 0.000 | 0.000  | 0.000  | 0.000  |
| La                             |       | 0.000  | 0.000  | 0.000  | 0.000  | 0.011  | 0.000  | 0.000 | 0.023  | 0.000  | 0.000  |
| Nd                             |       | 0.005  | 0.000  | 0.000  | 0.000  | 0.004  | 0.004  | 0.000 | 0.008  | 0.000  | 0.000  |
| Pr                             |       | 0.000  | 0.000  | 0.000  | 0.000  | 0.000  | 0.000  | 0.000 | 0.000  | 0.000  | 0.000  |
| Sm                             |       | 0.000  | 0.000  | 0.000  | 0.000  | 0.000  | 0.000  | 0.000 | 0.000  | 0.000  | 0.000  |
| Ce                             |       | 0.003  | 0.000  | 0.000  | 0.002  | 0.021  | 0.005  | 0.000 | 0.028  | 0.000  | 0.000  |
| Y                              |       | 0.000  | 0.000  | 0.000  | 0.000  | 0.001  | 0.000  | 0.000 | 0.006  | 0.000  | 0.000  |
| Na                             |       | 0.032  | 0.148  | 0.000  | 0.026  | 0.022  | 0.002  | 0.000 | 0.049  | 0.042  | 0.013  |
| <b>ΣM</b>                      |       | 10.00  | 10.00  | 10.00  | 10.00  | 10.000 | 10.00  | 10.00 | 10.00  | 10.00  | 10.00  |
| F                              |       | 1.494  | 1.852  | 1.885  | 1.579  | 1.443  | 1.342  | 1.884 | 1.238  | 1.827  | 1.852  |
| Cl                             |       | 0.048  | 0.148  | 0.115  | 0.017  | 0.123  | 0.025  | 0.116 | 0.178  | 0.173  | 0.148  |
| OH                             |       | 0.458  | 0.000  | 0.000  | 0.404  | 0.434  | 0.633  | 0.000 | 0.585  | 0.000  | 0.000  |
| <b>ΣX</b>                      |       | 2.000  | 2.000  | 2.000  | 2.000  | 2.000  | 2.000  | 2.000 | 2.000  | 2.000  | 2.000  |



**Table S2.** Atom coordinates and equivalent isotropic displacement parameters ( $U_{eq.} \times 10^2 \text{ \AA}^2$ ) for 33 apatite samples.

| Ion   |            | 1             | 2             | 3             | 4a (F)        | 4b (OH)       | 5             | 6             | 7             | 8a            |
|-------|------------|---------------|---------------|---------------|---------------|---------------|---------------|---------------|---------------|---------------|
| Ca1   | <i>x</i>   | $\frac{2}{3}$ |
|       | <i>y</i>   | $\frac{1}{3}$ |
| 4f    | <i>z</i>   | 0.0017(1)     | 0.0011(1)     | 0.0015(1)     | 0.0012(2)     | 0.0013(3)     | 0.0010(1)     | 0.0010(1)     | 0.0010(1)     | 0.0011(2)     |
|       | $U_{eq.}$  | 0.81          | 0.71          | 0.78          | 0.93(1)       | 0.93(1)       | 0.78          | 0.70          | 0.76          | 0.77(4)       |
|       | <i>sof</i> | 0.987(1)      | 0.963(1)      | 0.955(1)      | 0.981(4)      | 0.972(5)      | 0.956(1)      | 0.949(1)      | 0.958(1)      | 0.963(4)      |
| Ca2   | <i>x</i>   | -0.0071(1)    | -0.0070(1)    | -0.0066(1)    | -0.0076(2)    | -0.0065(3)    | -0.0072(1)    | -0.0071(1)    | -0.0071(1)    | -0.0070(3)    |
|       | <i>y</i>   | 0.2414(1)     | 0.2413(1)     | 0.2416(1)     | 0.2410(1)     | 0.2425(2)     | 0.2414(1)     | 0.2415(1)     | 0.2414(1)     | 0.2412(2)     |
| 6h    | <i>z</i>   | $\frac{1}{4}$ |
|       | $U_{eq}$   | 0.83          | 0.59          | 0.59          | 0.74(1)       | 0.74(1)       | 0.67          | 0.67          | 0.70          | 0.79(3)       |
|       | <i>sof</i> | 0.973(1)      | 0.948(1)      | 0.947(1)      | 0.975(3)      | 0.984(5)      | 0.961(1)      | 0.961(1)      | 0.963(1)      | 0.996(5)      |
| P     | <i>x</i>   | 0.3696(1)     | 0.3689(1)     | 0.3689(1)     | 0.3684(2)     | 0.3698(2)     | 0.3688(1)     | 0.3688(1)     | 0.3689(1)     | 0.3698(2)     |
|       | <i>y</i>   | 0.3986(1)     | 0.3982(1)     | 0.3979(1)     | 0.3973(2)     | 0.3998(3)     | 0.3982(1)     | 0.3982(1)     | 0.3983(1)     | 0.3986(2)     |
| 6h    | <i>z</i>   | $\frac{1}{4}$ |
|       | $U_{eq}$   | 0.49          | 0.29          | 0.23          | 0.43(1)       | 0.43(1)       | 0.34          | 0.34          | 0.37          | 0.76(4)       |
|       | <i>sof</i> | 0.938(2)      | 0.921(2)      | 0.911(2)      | 0.947(4)      | 0.943(6)      | 0.926(1)      | 0.928(2)      | 0.928(1)      | 1             |
| X     | <i>x</i>   | 0             | 0             | 0             | 0             | 0             | 0             | 0             | 0             | 0             |
|       | <i>y</i>   | 0             | 0             | 0             | 0             | 0             | 0             | 0             | 0             | 0             |
| 2a/4e | <i>z</i>   | $\frac{1}{4}$ | $\frac{1}{4}$ | $\frac{1}{4}$ | $\frac{1}{4}$ | 0.2272(12)    | $\frac{1}{4}$ | $\frac{1}{4}$ | $\frac{1}{4}$ | $\frac{1}{4}$ |
|       | $U_{eq}$   | 2.55          | 1.55          | 2.02          | 1.41(7)       | 1.41(7)       | 2.10          | 1.94          | 1.94          | 1.73(19)      |
|       | <i>sof</i> | 0.993(3)      | 0.949(3)      | 0.932(3)      | 0.954(8)      | 0.598(7)      | 0.987(1)      | 0.974(2)      | 0.981(2)      | 0.976(14)     |
| O1    | <i>x</i>   | 0.4865(1)     | 0.4846(1)     | 0.4846(1)     | 0.4850(4)     | 0.4845(5)     | 0.4846(1)     | 0.4844(1)     | 0.4846(1)     | 0.4861(6)     |
|       | <i>y</i>   | 0.3283(1)     | 0.3266(1)     | 0.3265(1)     | 0.3268(4)     | 0.3270(6)     | 0.3266(1)     | 0.3265(1)     | 0.3268(1)     | 0.3276(6)     |
| 6h    | <i>z</i>   | $\frac{1}{4}$ |
|       | $U_{eq}$   | 1.42          | 1.26          | 1.41          | 1.07(4)       | 1.07(4)       | 1.20          | 1.22          | 1.27          | 0.93(10)      |
| O2    | <i>x</i>   | 0.4659(1)     | 0.4674(1)     | 0.4669(1)     | 0.4659(4)     | 0.4680(6)     | 0.4666(1)     | 0.4666(1)     | 0.4660(1)     | 0.4702(6)     |
|       | <i>y</i>   | 0.5886(1)     | 0.5885(1)     | 0.5889(1)     | 0.5881(2)     | 0.5897(3)     | 0.5877(1)     | 0.5882(1)     | 0.5875(1)     | 0.5877(3)     |
| 6h    | <i>z</i>   | $\frac{1}{4}$ |
|       | $U_{eq}$   | 1.89          | 1.12          | 1.25          | 1.41(4)       | 1.41(4)       | 1.38          | 1.29          | 1.36          | 1.09(11)      |
| O3    | <i>x</i>   | 0.2565(1)     | 0.2563(1)     | 0.2571(1)     | 0.2570(2)     | 0.2568(3)     | 0.2565(1)     | 0.2564(1)     | 0.2566(1)     | 0.2600(3)     |
|       | <i>y</i>   | 0.3401(1)     | 0.3415(1)     | 0.3411(1)     | 0.3402(3)     | 0.3408(4)     | 0.3408(1)     | 0.3408(1)     | 0.3409(1)     | 0.3478(4)     |
| 12i   | <i>z</i>   | 0.0710(1)     | 0.0719(1)     | 0.0715(1)     | 0.0709(2)     | 0.0716(3)     | 0.0710(1)     | 0.0706(1)     | 0.0710(1)     | 0.0689(3)     |
|       | $U_{eq}$   | 2.26          | 1.71          | 1.96          | 1.58(3)       | 1.58(3)       | 1.60          | 1.71          | 1.67          | 1.31(7)       |

The *sofs* for O1, O2 and O3 were fixed at 1.0; all other *sofs* were refined. For sample 4, *U* for similar atoms were constrained to be equal. If an error is given for *U*, then it was refined as isotropic.

Table S2. Continued.

| Ion           |                       | 8b            | 9             | 10            | 11            | 12            | 13            | 14            | 15            | 16            |
|---------------|-----------------------|---------------|---------------|---------------|---------------|---------------|---------------|---------------|---------------|---------------|
| Ca1           | <i>x</i>              | $\frac{2}{3}$ |
|               | <i>y</i>              | $\frac{1}{3}$ |
| 4 <i>f</i>    | <i>z</i>              | 0.0014(2)     | 0.0010(1)     | 0.0011(1)     | 0.0010(1)     | 0.0010(1)     | 0.0010(1)     | 0.0010(1)     | 0.0010(1)     | 0.0010(1)     |
|               | <i>U<sub>eq</sub></i> | 1.01(4)       | 0.73          | 0.73          | 0.89          | 0.85          | 0.83          | 0.84          | 0.89          | 1.02          |
|               | <i>sof</i>            | 1.064(4)      | 0.958(1)      | 0.953(1)      | 0.943(1)      | 0.944(1)      | 0.952(1)      | 0.952(1)      | 0.957(2)      | 0.971(2)      |
| Ca2           | <i>x</i>              | -0.0078(2)    | -0.0069(1)    | -0.0070(1)    | -0.0077(1)    | -0.0075(1)    | -0.0070(1)    | -0.0073(1)    | -0.0073(1)    | -0.0076(1)    |
|               | <i>y</i>              | 0.2417(2)     | 0.2421(1)     | 0.2416(1)     | 0.2407(1)     | 0.2412(1)     | 0.2417(1)     | 0.2417(1)     | 0.2412(1)     | 0.2407(1)     |
| 6 <i>h</i>    | <i>z</i>              | $\frac{1}{4}$ |
|               | <i>U<sub>eq</sub></i> | 0.59(3)       | 0.67          | 0.68          | 0.81          | 0.80          | 0.77          | 0.74          | 0.89          | 0.96          |
|               | <i>sof</i>            | 1.034(4)      | 0.964(1)      | 0.965(1)      | 0.982(1)      | 0.972(1)      | 0.975(1)      | 0.971(1)      | 0.993(1)      | 1.010(1)      |
| P             | <i>x</i>              | 0.3685(2)     | 0.3687(1)     | 0.3688(1)     | 0.3692(1)     | 0.3688(1)     | 0.3688(1)     | 0.3687(1)     | 0.3692(1)     | 0.3692(1)     |
|               | <i>y</i>              | 0.3981(2)     | 0.3981(1)     | 0.3981(1)     | 0.3984(1)     | 0.3983(1)     | 0.3981(1)     | 0.3983(1)     | 0.3984(1)     | 0.3983(1)     |
| 6 <i>h</i>    | <i>z</i>              | $\frac{1}{4}$ |
|               | <i>U<sub>eq</sub></i> | 0.44(3)       | 0.30          | 0.34          | 0.42          | 0.41          | 0.40          | 0.34          | 0.47          | 0.56          |
|               | <i>sof</i>            | 1             | 0.931(1)      | 0.932(2)      | 0.911(2)      | 0.914(1)      | 0.932(2)      | 0.915(1)      | 0.925(2)      | 0.920(2)      |
| X             | <i>x</i>              | 0             | 0             | 0             | 0             | 0             | 0             | 0             | 0             | 0             |
|               | <i>y</i>              | 0             | 0             | 0             | 0             | 0             | 0             | 0             | 0             | 0             |
| 2 <i>a/4e</i> | <i>z</i>              | $\frac{1}{4}$ |
|               | <i>U<sub>eq</sub></i> | 2.08(18)      | 2.28          | 2.05          | 2.51          | 2.39          | 2.22          | 2.50          | 2.89          | 3.05          |
|               | <i>sof</i>            | 1.05(1)       | 0.973(2)      | 0.982(3)      | 0.977(3)      | 0.973(2)      | 0.981(3)      | 0.981(2)      | 1.005(3)      | 0.982(3)      |
| O1            | <i>x</i>              | 0.4844(5)     | 0.4841(1)     | 0.4845(1)     | 0.4842(1)     | 0.4843(1)     | 0.4848(1)     | 0.4844(1)     | 0.4838(1)     | 0.4839(1)     |
|               | <i>y</i>              | 0.3267(6)     | 0.3263(1)     | 0.3265(1)     | 0.3267(1)     | 0.3271(1)     | 0.3266(1)     | 0.3267(1)     | 0.3262(1)     | 0.3263(1)     |
| 6 <i>h</i>    | <i>z</i>              | $\frac{1}{4}$ |
|               | <i>U<sub>eq</sub></i> | 0.71(9)       | 1.19          | 1.08          | 1.39          | 1.27          | 1.24          | 1.26          | 1.29          | 1.41          |
| O2            | <i>x</i>              | 0.4617(5)     | 0.4665(1)     | 0.4662(1)     | 0.4662(1)     | 0.4660(1)     | 0.4662(1)     | 0.4666(1)     | 0.4657(1)     | 0.4665(1)     |
|               | <i>y</i>              | 0.5874(2)     | 0.5877(1)     | 0.5881(1)     | 0.5871(1)     | 0.5876(1)     | 0.5881(1)     | 0.5881(1)     | 0.5874(1)     | 0.5875(1)     |
| 6 <i>h</i>    | <i>z</i>              | $\frac{1}{4}$ |
|               | <i>U<sub>eq</sub></i> | 0.85(9)       | 1.24          | 1.18          | 1.49          | 1.37          | 1.27          | 1.24          | 1.57          | 1.6           |
| O3            | <i>x</i>              | 0.2540(3)     | 0.2568(1)     | 0.2566(1)     | 0.2559(1)     | 0.2567(1)     | 0.2567(1)     | 0.2563(1)     | 0.2567(1)     | 0.2570(1)     |
|               | <i>y</i>              | 0.3342(3)     | 0.3412(1)     | 0.3409(1)     | 0.3406(1)     | 0.3412(1)     | 0.3412(1)     | 0.3408(1)     | 0.3406(1)     | 0.3414(1)     |
| 12 <i>i</i>   | <i>z</i>              | 0.0730(2)     | 0.0711(1)     | 0.0710(1)     | 0.0714(1)     | 0.0709(1)     | 0.0708(1)     | 0.0709(1)     | 0.0707(1)     | 0.0709(1)     |
|               | <i>U<sub>eq</sub></i> | 0.93(6)       | 1.54          | 1.57          | 1.96          | 1.89          | 1.72          | 1.81          | 1.84          | 2.04          |

Table S2. Continued.

| Ion           |                       | 17            | 18            | 19            | 20            | 21            | 22            | 23            | 24            | 25            |
|---------------|-----------------------|---------------|---------------|---------------|---------------|---------------|---------------|---------------|---------------|---------------|
| Ca1           | <i>x</i>              | $\frac{2}{3}$ |
|               | <i>y</i>              | $\frac{1}{3}$ |
| 4 <i>f</i>    | <i>z</i>              | 0.0019(1)     | 0.0007(1)     | 0.0011(1)     | 0.0005(1)     | 0.0011(1)     | 0.0010(1)     | 0.0012(1)     | 0.0011(1)     | 0.0012(1)     |
|               | <i>U<sub>eq</sub></i> | 0.87          | 0.84          | 0.91          | 1.23          | 0.90          | 0.89          | 0.81          | 0.97          | 0.94          |
|               | <i>sof</i>            | 0.969(1)      | 0.939(1)      | 0.964(2)      | 0.956(2)      | 0.952(2)      | 0.947(2)      | 0.949(2)      | 0.960(1)      | 0.982(1)      |
| Ca2           | <i>x</i>              | -0.0068(1)    | -0.0071(1)    | -0.0071(1)    | -0.0068(1)    | -0.0068(1)    | -0.0072(1)    | -0.0071(1)    | -0.0075(1)    | -0.0066(1)    |
|               | <i>y</i>              | 0.2426(1)     | 0.2422(1)     | 0.2430(1)     | 0.2428(1)     | 0.2436(1)     | 0.2428(1)     | 0.2440(1)     | 0.2427(1)     | 0.2442(1)     |
| 6 <i>h</i>    | <i>z</i>              | $\frac{1}{4}$ |
|               | <i>U<sub>eq</sub></i> | 0.86          | 0.83          | 0.85          | 1.28          | 1.02          | 0.83          | 0.89          | 1.01          | 0.93          |
|               | <i>sof</i>            | 0.985(1)      | 0.971(1)      | 0.971(1)      | 0.984(2)      | 0.966(2)      | 0.947(1)      | 0.972(2)      | 0.973(1)      | 1.009(1)      |
| P             | <i>x</i>              | 0.3692(1)     | 0.3690(1)     | 0.3688(1)     | 0.3692(1)     | 0.3692(1)     | 0.3689(1)     | 0.3688(1)     | 0.3692(1)     | 0.3691(1)     |
|               | <i>y</i>              | 0.3986(1)     | 0.3988(1)     | 0.3983(1)     | 0.3986(1)     | 0.3989(1)     | 0.3985(1)     | 0.3987(1)     | 0.3989(1)     | 0.3988(1)     |
| 6 <i>h</i>    | <i>z</i>              | $\frac{1}{4}$ |
|               | <i>U<sub>eq</sub></i> | 0.43          | 0.37          | 0.37          | 0.78          | 0.51          | 0.40          | 0.42          | 0.51          | 0.44          |
|               | <i>sof</i>            | 0.949(2)      | 0.917(1)      | 0.934(2)      | 0.941(3)      | 0.928(2)      | 0.907(2)      | 0.930(2)      | 0.935(2)      | 0.958(2)      |
| X             | <i>x</i>              | 0             | 0             | 0             | 0             | 0             | 0             | 0             | 0             | 0             |
|               | <i>y</i>              | 0             | 0             | 0             | 0             | 0             | 0             | 0             | 0             | 0             |
| 2 <i>a/4e</i> | <i>z</i>              | $\frac{1}{4}$ |
|               | <i>U<sub>eq</sub></i> | 2.86          | 3.02          | 3.53          | 3.66          | 5.04          | 4.90          | 5.70          | 5.14          | 5.17          |
|               | <i>sof</i>            | 1.013(3)      | 0.972(2)      | 0.987(3)      | 1.009(5)      | 1.019(4)      | 0.963(3)      | 1.017(4)      | 0.997(3)      | 1.004(3)      |
| O1            | <i>x</i>              | 0.4842(1)     | 0.4847(1)     | 0.4840(1)     | 0.4837(2)     | 0.4850(2)     | 0.4858(1)     | 0.4855(1)     | 0.4841(1)     | 0.4843(1)     |
|               | <i>y</i>              | 0.3269(1)     | 0.3275(1)     | 0.3267(1)     | 0.3270(2)     | 0.3282(2)     | 0.3282(1)     | 0.3281(1)     | 0.3270(1)     | 0.3275(1)     |
| 6 <i>h</i>    | <i>z</i>              | $\frac{1}{4}$ |
|               | <i>U<sub>eq</sub></i> | 1.01          | 1.38          | 1.23          | 1.45          | 1.43          | 1.60          | 1.18          | 1.30          | 1.13          |
| O2            | <i>x</i>              | 0.4657(1)     | 0.4669(1)     | 0.4662(1)     | 0.4665(2)     | 0.4652(2)     | 0.4664(1)     | 0.4665(2)     | 0.4665(1)     | 0.4659(1)     |
|               | <i>y</i>              | 0.5880(1)     | 0.5876(1)     | 0.5876(1)     | 0.5874(2)     | 0.5870(2)     | 0.5863(1)     | 0.5878(1)     | 0.5872(1)     | 0.5874(1)     |
| 6 <i>h</i>    | <i>z</i>              | $\frac{1}{4}$ |
|               | <i>U<sub>eq</sub></i> | 1.50          | 1.33          | 1.46          | 1.44          | 1.52          | 1.61          | 1.37          | 1.56          | 1.48          |
| O3            | <i>x</i>              | 0.2566(1)     | 0.2563(1)     | 0.2571(1)     | 0.2561(2)     | 0.2565(1)     | 0.2566(1)     | 0.2570(1)     | 0.2562(1)     | 0.2572(1)     |
|               | <i>y</i>              | 0.3411(1)     | 0.3413(1)     | 0.3412(1)     | 0.3411(2)     | 0.3411(1)     | 0.3418(1)     | 0.3418(1)     | 0.3416(1)     | 0.3422(1)     |
| 12 <i>i</i>   | <i>z</i>              | 0.0718(1)     | 0.0715(1)     | 0.0714(1)     | 0.0714(2)     | 0.0709(1)     | 0.0717(1)     | 0.0712(1)     | 0.0713(1)     | 0.0705(1)     |
|               | <i>U<sub>eq</sub></i> | 1.72          | 1.99          | 1.89          | 1.95          | 2.07          | 2.17          | 2.03          | 2.32          | 1.79          |

Table S2. Continued.

| Ion                    |                       | 26            | 27            | 28            | 29a           | 29b           | 30a (Cl)      | 30b (OH)      | 31a (F)       | 31b(OH)       |
|------------------------|-----------------------|---------------|---------------|---------------|---------------|---------------|---------------|---------------|---------------|---------------|
| Ca1                    | <i>x</i>              | $\frac{2}{3}$ |
|                        | <i>y</i>              | $\frac{1}{3}$ |
| 4 <i>f</i>             | <i>z</i>              | 0.0011(1)     | 0.0012(1)     | 0.0019(1)     | 0.0008(2)     | 0.0022(2)     | 0.0030(1)     | 0.0007(7)     | 0.0010(1)     | 0.0052(13)    |
|                        | <i>U<sub>eq</sub></i> | 0.86          | 0.92          | 0.62          | 0.75          | 0.92          | 0.92          | 0.41(10)      | 0.96          | 1.39(11)      |
|                        | <i>sof</i>            | 0.953(1)      | 0.940(2)      | 0.940(2)      | 0.951(3)      | 0.958(4)      | 0.947(1)      | 1             | 1.020(2)      | 1             |
| Ca2                    | <i>x</i>              | -0.0068(1)    | -0.0066(1)    | -0.0062(1)    | -0.0068(1)    | -0.0065(1)    | 0.0020(1)     | -0.0050(4)    | -0.0077(1)    | -0.0085(5)    |
|                        | <i>y</i>              | 0.2445(1)     | 0.2444(1)     | 0.2461(1)     | 0.2442(1)     | 0.2457(1)     | 0.2581(1)     | 0.2512(3)     | 0.2433(1)     | 0.2457(4)     |
| 6 <i>h</i>             | <i>z</i>              | $\frac{1}{4}$ |
|                        | <i>U<sub>eq</sub></i> | 0.99          | 1.11          | 0.81          | 0.85          | 1.16          | 1.25          | 0.36(7)       | 0.97          | 1.39(9)       |
|                        | <i>sof</i>            | 0.994(1)      | 0.954(1)      | 0.974(2)      | 1.006(3)      | 0.987(3)      | 0.976(1)      | 1             | 1.020(1)      | 1             |
| P                      | <i>x</i>              | 0.3691(1)     | 0.3687(1)     | 0.3674(1)     | 0.3689(1)     | 0.3691(1)     | 0.3737(1)     | 0.3672(4)     | 0.3694(1)     | 0.3733(6)     |
|                        | <i>y</i>              | 0.3990(1)     | 0.3990(1)     | 0.3993(1)     | 0.3987(1)     | 0.3992(1)     | 0.4063(1)     | 0.4012(5)     | 0.3991(1)     | 0.4019(6)     |
| 6 <i>h</i>             | <i>z</i>              | $\frac{1}{4}$ |
|                        | <i>U<sub>eq</sub></i> | 0.46          | 0.48          | 0.25          | 0.35          | 0.42          | 0.68          | 0.50(10)      | 1.26          | 2.71(15)      |
|                        | <i>sof</i>            | 0.938(2)      | 0.909(2)      | 0.932(3)      | 0.953(4)      | 0.920(5)      | 0.939(2)      | 1             | 1             | 1             |
| X                      | <i>x</i>              | 0             | 0             | 0             | 0             | 0             | 0             | 0             | 0             | 0             |
|                        | <i>y</i>              | 0             | 0             | 0             | 0             | 0             | 0             | 0             | 0             | 0             |
| 2 <i>a</i> /4 <i>e</i> | <i>z</i>              | $\frac{1}{4}$ | $\frac{1}{4}$ | $\frac{1}{4}$ | $\frac{1}{4}$ | $\frac{1}{4}$ | 0.4347(2)     | 0.1937(31)    | $\frac{1}{4}$ | $\frac{1}{4}$ |
|                        | <i>U<sub>eq</sub></i> | 6.62          | 6.52          | 7.55          | 8.61          | 5.60          | 3.01          | 3.35(80)      | 5.38          | 5.6(6)        |
|                        | <i>sof</i>            | 1.038(3)      | 1.038(4)      | 0.972(4)      | 1.066(6) F    | 1.056(8) F    | 0.452(1) Cl   | 0.5 OH        | 1.053(4) F    | 1 F           |
| O1                     | <i>x</i>              | 0.4847(1)     | 0.4859(1)     | 0.4873(2)     | 0.4849(2)     | 0.4849(3)     | 0.4928(1)     | 0.4807(8)     | 0.4856(2)     | 0.4842(9)     |
|                        | <i>y</i>              | 0.3286(1)     | 0.3289(1)     | 0.3288(2)     | 0.3286(2)     | 0.3292(3)     | 0.3426(1)     | 0.3301(8)     | 0.3296(2)     | 0.3260(9)     |
| 6 <i>h</i>             | <i>z</i>              | $\frac{1}{4}$ |
|                        | <i>U<sub>eq</sub></i> | 1.27          | 1.44          | 0.88          | 1.12          | 1.15          | 1.91          | 1.15(14)      | 0.60          | 0.04(26)      |
| O2                     | <i>x</i>              | 0.4655(1)     | 0.4655(2)     | 0.4638(2)     | 0.4655(2)     | 0.4661(3)     | 0.4630(1)     | 0.4660(9)     | 0.4660(2)     | 0.4646(11)    |
|                        | <i>y</i>              | 0.5878(1)     | 0.5867(1)     | 0.5850(2)     | 0.5878(2)     | 0.5877(3)     | 0.5902(1)     | 0.5872(5)     | 0.5865(2)     | 0.5897(6)     |
| 6 <i>h</i>             | <i>z</i>              | $\frac{1}{4}$ |
|                        | <i>U<sub>eq</sub></i> | 1.33          | 1.74          | 1.47          | 1.10          | 1.48          | 1.69          | 1.15(14)      | 0.49          | 0.48(28)      |
| O3                     | <i>x</i>              | 0.2570(1)     | 0.2571(1)     | 0.2580(1)     | 0.2567(2)     | 0.2574(2)     | 0.2646(1)     | 0.2503(5)     | 0.2569(1)     | 0.2610(9)     |
|                        | <i>y</i>              | 0.3416(1)     | 0.3421(1)     | 0.3426(1)     | 0.3426(2)     | 0.3411(2)     | 0.3528(1)     | 0.3343(6)     | 0.3413(2)     | 0.3458(9)     |
| 12 <i>i</i>            | <i>z</i>              | 0.0706(1)     | 0.0714(1)     | 0.0691(1)     | 0.0709(2)     | 0.0709(3)     | 0.0678(1)     | 0.0764(6)     | 0.0689(2)     | 0.0718(9)     |
|                        | <i>U<sub>eq</sub></i> | 1.91          | 2.13          | 1.50          | 1.85          | 2.28          | 2.51          | 1.15(14)      | 2.10          | 2.60(27)      |



Table S2. Continued.

| Ion           |                       | 32            | 33a (F)       | 33b (F)       | 33c (F)       |
|---------------|-----------------------|---------------|---------------|---------------|---------------|
| Ca1           | <i>x</i>              | $\frac{2}{3}$ | $\frac{2}{3}$ | $\frac{2}{3}$ | $\frac{2}{3}$ |
|               | <i>y</i>              | $\frac{1}{3}$ | $\frac{1}{3}$ | $\frac{1}{3}$ | $\frac{1}{3}$ |
| 4 <i>f</i>    | <i>z</i>              | 0.0026(1)     | 0.0011(1)     | 0.0015(3)     | 0.0017(3)     |
|               | <i>U<sub>eq</sub></i> | 0.91          | 0.85(1)       | 0.85(1)       | 0.85(1)       |
|               | <i>sof</i>            | 0.964(1)      | 1.011(2)      | 1.038(5)      | 1.081(4)      |
| Ca2           | <i>x</i>              | 0.0019(1)     | −0.0070(1)    | −0.0074(3)    | −0.0064(2)    |
|               | <i>y</i>              | 0.2579(1)     | 0.2421(1)     | 0.2413(2)     | 0.2419(2)     |
| 6 <i>h</i>    | <i>z</i>              | $\frac{1}{4}$ | $\frac{1}{4}$ | $\frac{1}{4}$ | $\frac{1}{4}$ |
|               | <i>U<sub>eq</sub></i> | 1.16          | 0.545(9)      | 0.545(9)      | 0.545(9)      |
|               | <i>sof</i>            | 0.988(1)      | 0.989(2)      | 1.009(5) F    | 1.014(3)      |
| P             | <i>x</i>              | 0.3742(1)     | 0.3692(1)     | 0.3694(3)     | 0.3706(2)     |
|               | <i>y</i>              | 0.4063(1)     | 0.3981(1)     | 0.3987(3)     | 0.3982(2)     |
| 6 <i>h</i>    | <i>z</i>              | $\frac{1}{4}$ | $\frac{1}{4}$ | $\frac{1}{4}$ | $\frac{1}{4}$ |
|               | <i>U<sub>eq</sub></i> | 0.60          | 0.43(1)       | 0.43(1)       | 0.43(1)       |
|               | <i>sof</i>            | 0.946(2)      | 1             | 1             | 1             |
| X             | <i>x</i>              | 0             | 0             | 0             | 0             |
|               | <i>y</i>              | 0             | 0             | 0             | 0             |
| 2 <i>a/4e</i> | <i>z</i>              | 0.43174(17)   | $\frac{1}{4}$ | $\frac{1}{4}$ | $\frac{1}{4}$ |
|               | <i>U<sub>eq</sub></i> | 3.44          | 1.98(6)       | 1.98(6)       | 1.98(6)       |
|               | <i>sof</i>            | 0.455(1)      | 0.956(5) F    | 1.152(15) F   | 1.135(11) F   |
| O1            | <i>x</i>              | 0.4906(1)     | 0.4855(2)     | 0.4847(6)     | 0.4851(5)     |
|               | <i>y</i>              | 0.3424(1)     | 0.3269(2)     | 0.3266(7)     | 0.3253(5)     |
| 6 <i>h</i>    | <i>z</i>              | $\frac{1}{4}$ | $\frac{1}{4}$ | $\frac{1}{4}$ | $\frac{1}{4}$ |
|               | <i>U<sub>eq</sub></i> | 1.63          | 0.67(3)       | 0.67(3)       | 0.67(3)       |
| O2            | <i>x</i>              | 0.4651(1)     | 0.4664(3)     | 0.4669(7)     | 0.4651(5)     |
|               | <i>y</i>              | 0.5913(1)     | 0.5883(2)     | 0.5877(3)     | 0.5874(3)     |
| 6 <i>h</i>    | <i>z</i>              | $\frac{1}{4}$ | $\frac{1}{4}$ | $\frac{1}{4}$ | $\frac{1}{4}$ |
|               | <i>U<sub>eq</sub></i> | 1.52          | 0.84(3)       | 0.84(3)       | 0.84(3)       |
| O3            | <i>x</i>              | 0.2650(1)     | 0.2552(2)     | 0.2561(4)     | 0.2565(3)     |
|               | <i>y</i>              | 0.3518(1)     | 0.3398(2)     | 0.3420(5)     | 0.3405(4)     |
| 12 <i>i</i>   | <i>z</i>              | 0.0680(1)     | 0.0713(2)     | 0.0721(4)     | 0.0717(3)     |
|               | <i>U<sub>eq</sub></i> | 2.49          | 0.95(2)       | 0.95(2)       | 0.95(2)       |

**Table S3.** Apatite samples: anisotropic displacement parameters ( $U_{ij} \times 10^2 \text{ \AA}^2$ ) and  $U_{eq} \times 10^2 \text{ \AA}^2$ , and the ratio ( $U_{33}/U_{11}$ ).

| Ion      | $U_{11}$ | $U_{22}$ | $U_{33}$ | $U_{12}$ | $U_{13}$ | $U_{23}$ | $U_{eq}$ | $(U_{33}/U_{11})$ |
|----------|----------|----------|----------|----------|----------|----------|----------|-------------------|
| Sample 1 |          |          |          |          |          |          |          |                   |
| Ca1      | 0.97(1)  | 0.97(1)  | 0.46(2)  | 0.49(1)  | 0        | 0        | 0.81     | 3.07              |
| Ca2      | 0.77(2)  | 0.90(2)  | 0.74(1)  | 0.40(2)  | 0        | 0        | 0.83     |                   |
| P        | 0.46(3)  | 0.52(2)  | 0.49(2)  | 0.28(2)  | 0        | 0        | 0.49     |                   |
| F        | 1.50(6)  | 1.50(6)  | 4.60(9)  | 0.75(3)  | 0        | 0        | 2.55     |                   |
| O1       | 1.30(7)  | 1.99(7)  | 1.52(7)  | 1.46(6)  | 0        | 0        | 1.42     |                   |
| O2       | 1.24(7)  | 0.90(7)  | 3.58(9)  | 0.51(6)  | 0        | 0        | 1.89     |                   |
| O3       | 1.74(5)  | 3.90(6)  | 0.90(4)  | 1.83(5)  | -0.57(4) | -0.88(4) | 2.26     |                   |
| Sample 2 |          |          |          |          |          |          |          |                   |
| Ca1      | 0.85(1)  | 0.85(1)  | 0.40(2)  | 0.43(1)  | 0        | 0        | 0.71     | 3.72              |
| Ca2      | 0.69(1)  | 0.58(2)  | 0.58(1)  | 0.36(1)  | 0        | 0        | 0.59     |                   |
| P        | 0.38(2)  | 0.31(2)  | 0.31(2)  | 0.26(2)  | 0        | 0        | 0.29     |                   |
| F        | 0.81(4)  | 0.81(4)  | 3.01(9)  | 0.41(2)  | 0        | 0        | 1.55     |                   |
| O1       | 0.92(6)  | 1.32(5)  | 1.75(6)  | 0.84(5)  | 0        | 0        | 1.26     |                   |
| O2       | 0.91(5)  | 0.20(5)  | 2.22(6)  | 0.07(4)  | 0        | 0        | 1.12     |                   |
| O3       | 1.29(4)  | 3.03(5)  | 0.63(3)  | 1.42(4)  | -0.59(3) | -0.88(3) | 1.71     |                   |
| Sample 3 |          |          |          |          |          |          |          |                   |
| Ca1      | 0.93(1)  | 0.93(1)  | 0.45(2)  | 0.47(1)  | 0        | 0        | 0.78     | 1.90              |
| Ca2      | 0.72(2)  | 0.59(2)  | 0.52(1)  | 0.34(1)  | 0        | 0        | 0.59     |                   |
| P        | 0.28(2)  | 0.31(2)  | 0.16(2)  | 0.20(2)  | 0        | 0        | 0.23     |                   |
| F        | 1.54(5)  | 1.54(5)  | 2.93(9)  | 0.77(3)  | 0        | 0        | 2.02     |                   |
| O1       | 1.71(7)  | 2.04(6)  | 1.06(6)  | 1.51(6)  | 0        | 0        | 1.41     |                   |
| O2       | 0.86(5)  | 0.46(5)  | 2.39(7)  | 0.21(4)  | 0        | 0        | 1.25     |                   |
| O3       | 1.45(4)  | 3.53(5)  | 0.51(4)  | 1.51(4)  | -0.35(3) | -0.59(3) | 1.96     |                   |
| Sample 5 |          |          |          |          |          |          |          |                   |
| Ca1      | 0.96(1)  | 0.96(1)  | 0.41(1)  | 0.48(1)  | 0        | 0        | 0.78     | 3.49              |
| Ca2      | 0.66(1)  | 0.70(1)  | 0.59(1)  | 0.33(1)  | 0        | 0        | 0.67     |                   |
| P        | 0.35(1)  | 0.40(1)  | 0.29(1)  | 0.22(1)  | 0        | 0        | 0.34     |                   |
| F        | 1.14(3)  | 1.14(3)  | 3.99(6)  | 0.57(1)  | 0        | 0        | 2.10     |                   |
| O1       | 1.16(3)  | 1.51(3)  | 1.38(3)  | 1.11(3)  | 0        | 0        | 1.20     |                   |
| O2       | 0.98(3)  | 0.58(3)  | 2.48(4)  | 0.23(3)  | 0        | 0        | 1.38     |                   |
| O3       | 1.30(2)  | 2.50(3)  | 0.84(2)  | 1.16(2)  | -0.50(2) | -0.67(2) | 1.60     |                   |
| Sample 6 |          |          |          |          |          |          |          |                   |
| Ca1      | 0.87(1)  | 0.87(1)  | 0.35(2)  | 0.44(1)  | 0        | 0        | 0.70     | 3.64              |
| Ca2      | 0.69(1)  | 0.71(2)  | 0.61(1)  | 0.36(1)  | 0        | 0        | 0.67     |                   |
| P        | 0.33(2)  | 0.39(2)  | 0.32(2)  | 0.23(2)  | 0        | 0        | 0.34     |                   |
| F        | 1.03(5)  | 1.03(5)  | 3.75(9)  | 0.51(2)  | 0        | 0        | 1.94     |                   |
| O1       | 1.25(6)  | 1.60(6)  | 1.30(6)  | 1.21(5)  | 0        | 0        | 1.22     |                   |
| O2       | 1.09(5)  | 0.63(5)  | 2.12(7)  | 0.31(4)  | 0        | 0        | 1.29     |                   |
| O3       | 1.30(4)  | 2.66(5)  | 0.81(3)  | 1.08(4)  | -0.42(3) | -0.64(3) | 1.71     |                   |
| Sample 7 |          |          |          |          |          |          |          |                   |
| Ca1      | 0.93(1)  | 0.93(1)  | 0.40(1)  | 0.47(1)  | 0        | 0        | 0.76     | 3.04              |
| Ca2      | 0.72(1)  | 0.72(1)  | 0.66(1)  | 0.37(1)  | 0        | 0        | 0.70     |                   |
| P        | 0.32(2)  | 0.39(2)  | 0.38(2)  | 0.20(2)  | 0        | 0        | 0.37     |                   |
| F        | 1.15(4)  | 1.15(4)  | 3.49(9)  | 0.57(2)  | 0        | 0        | 1.94     |                   |
| O1       | 1.21(6)  | 1.50(5)  | 1.53(6)  | 1.10(5)  | 0        | 0        | 1.27     |                   |
| O2       | 0.94(5)  | 0.77(5)  | 2.33(6)  | 0.37(4)  | 0        | 0        | 1.36     |                   |
| O3       | 1.32(4)  | 2.69(4)  | 0.75(3)  | 1.20(3)  | -0.39(3) | -0.65(3) | 1.67     |                   |
| Sample 9 |          |          |          |          |          |          |          |                   |
| Ca1      | 0.91(1)  | 0.91(1)  | 0.36(1)  | 0.46(1)  | 0        | 0        | 0.73     |                   |

|           |         |         |          |         |          |          |      |      |
|-----------|---------|---------|----------|---------|----------|----------|------|------|
| Ca2       | 0.66(1) | 0.70(1) | 0.60(1)  | 0.34(1) | 0        | 0        | 0.67 |      |
| P         | 0.32(2) | 0.36(2) | 0.26(2)  | 0.21(1) | 0        | 0        | 0.30 |      |
| F         | 1.18(4) | 1.18(4) | 4.47(9)  | 0.59(2) | 0        | 0        | 2.28 | 3.79 |
| O1        | 1.22(5) | 1.59(5) | 1.23(5)  | 1.17(4) | 0        | 0        | 1.19 |      |
| O2        | 0.95(5) | 0.60(5) | 2.15(6)  | 0.29(4) | 0        | 0        | 1.24 |      |
| O3        | 1.30(3) | 2.45(4) | 0.72(3)  | 1.16(3) | -0.37(3) | -0.60(3) | 1.54 |      |
| Sample 10 |         |         |          |         |          |          |      |      |
| Ca1       | 0.92(1) | 0.92(1) | 0.34(2)  | 0.46(1) | 0        | 0        | 0.73 |      |
| Ca2       | 0.69(2) | 0.73(2) | 0.59(1)  | 0.36(1) | 0        | 0        | 0.68 |      |
| P         | 0.31(2) | 0.41(2) | 0.27(2)  | 0.19(2) | 0        | 0        | 0.34 |      |
| F         | 1.09(5) | 1.09(5) | 3.96(10) | 0.55(3) | 0        | 0        | 2.05 | 3.63 |
| O1        | 1.09(6) | 1.41(6) | 1.09(6)  | 1.01(5) | 0        | 0        | 1.08 |      |
| O2        | 1.06(6) | 0.59(6) | 1.97(7)  | 0.37(5) | 0        | 0        | 1.18 |      |
| O3        | 1.28(4) | 2.46(5) | 0.71(4)  | 1.06(4) | -0.40(3) | -0.66(3) | 1.57 |      |
| Sample 11 |         |         |          |         |          |          |      |      |
| Ca1       | 1.11(1) | 1.11(1) | 0.43(2)  | 0.55(1) | 0        | 0        | 0.89 |      |
| Ca2       | 0.83(2) | 0.86(2) | 0.73(1)  | 0.45(1) | 0        | 0        | 0.81 |      |
| P         | 0.37(2) | 0.49(2) | 0.41(2)  | 0.26(2) | 0        | 0        | 0.42 |      |
| F         | 1.56(6) | 1.56(6) | 4.39(11) | 0.78(3) | 0        | 0        | 2.51 | 2.81 |
| O1        | 1.24(6) | 1.83(6) | 1.51(6)  | 1.27(6) | 0        | 0        | 1.39 |      |
| O2        | 0.95(6) | 0.93(6) | 2.41(7)  | 0.34(5) | 0        | 0        | 1.49 |      |
| O3        | 1.52(4) | 3.03(6) | 1.00(4)  | 1.31(4) | -0.53(3) | -0.76(4) | 1.96 |      |
| Sample 12 |         |         |          |         |          |          |      |      |
| Ca1       | 1.07(1) | 1.07(1) | 0.40(1)  | 0.54(1) | 0        | 0        | 0.85 |      |
| Ca2       | 0.81(1) | 0.86(1) | 0.73(1)  | 0.43(1) | 0        | 0        | 0.80 |      |
| P         | 0.37(2) | 0.46(2) | 0.39(2)  | 0.23(2) | 0        | 0        | 0.41 |      |
| F         | 1.30(5) | 1.30(5) | 4.54(10) | 0.65(2) | 0        | 0        | 2.39 | 3.49 |
| O1        | 1.25(6) | 1.54(5) | 1.41(5)  | 1.11(5) | 0        | 0        | 1.27 |      |
| O2        | 1.03(5) | 0.73(5) | 2.22(6)  | 0.28(4) | 0        | 0        | 1.37 |      |
| O3        | 1.45(4) | 3.02(5) | 0.93(3)  | 1.35(4) | -0.40(3) | -0.66(3) | 1.89 |      |
| Sample 13 |         |         |          |         |          |          |      |      |
| Ca1       | 1.03(1) | 1.03(1) | 0.43(2)  | 0.51(1) | 0        | 0        | 0.83 |      |
| Ca2       | 0.79(2) | 0.88(2) | 0.61(1)  | 0.42(2) | 0        | 0        | 0.77 |      |
| P         | 0.40(2) | 0.46(2) | 0.34(2)  | 0.23(2) | 0        | 0        | 0.40 |      |
| F         | 1.40(6) | 1.40(6) | 3.83(11) | 0.70(3) | 0        | 0        | 2.22 | 2.74 |
| O1        | 1.28(7) | 1.53(6) | 1.26(6)  | 1.07(6) | 0        | 0        | 1.24 |      |
| O2        | 1.09(6) | 0.89(6) | 1.83(7)  | 0.45(5) | 0        | 0        | 1.27 |      |
| O3        | 1.61(5) | 2.74(5) | 0.72(4)  | 1.33(4) | -0.50(3) | -0.77(3) | 1.72 |      |
| Sample 14 |         |         |          |         |          |          |      |      |
| Ca1       | 1.05(1) | 1.05(1) | 0.41(1)  | 0.52(1) | 0        | 0        | 0.84 |      |
| Ca2       | 0.72(1) | 0.86(1) | 0.58(1)  | 0.41(1) | 0        | 0        | 0.74 |      |
| P         | 0.33(2) | 0.41(2) | 0.34(2)  | 0.25(1) | 0        | 0        | 0.34 |      |
| F         | 1.25(4) | 1.25(4) | 4.97(9)  | 0.63(2) | 0        | 0        | 2.50 | 3.98 |
| O1        | 1.11(5) | 1.65(5) | 1.37(5)  | 1.11(4) | 0        | 0        | 1.26 |      |
| O2        | 0.94(5) | 0.49(4) | 2.20(5)  | 0.19(4) | 0        | 0        | 1.24 |      |
| O3        | 1.42(3) | 2.91(4) | 0.85(3)  | 1.31(3) | -0.40(3) | -0.72(3) | 1.81 |      |
| Sample 15 |         |         |          |         |          |          |      |      |
| Ca1       | 1.08(2) | 1.08(2) | 0.49(2)  | 0.54(1) | 0        | 0        | 0.89 |      |
| Ca2       | 0.81(2) | 0.95(2) | 0.80(2)  | 0.41(2) | 0        | 0        | 0.89 |      |
| P         | 0.38(3) | 0.48(3) | 0.51(2)  | 0.19(2) | 0        | 0        | 0.47 |      |
| F         | 1.35(6) | 1.35(6) | 5.93(14) | 0.68(3) | 0        | 0        | 2.89 | 4.39 |
| O1        | 1.15(8) | 1.43(7) | 1.70(8)  | 1.06(6) | 0        | 0        | 1.29 |      |
| O2        | 1.10(7) | 0.89(7) | 2.89(9)  | 0.60(6) | 0        | 0        | 1.57 |      |

|           |          |          |           |          |          |          |      |      |
|-----------|----------|----------|-----------|----------|----------|----------|------|------|
| O3        | 1.58(5)  | 2.85(6)  | 0.91(4)   | 1.32(5)  | -0.56(4) | -0.82(4) | 1.84 |      |
| Sample 16 |          |          |           |          |          |          |      |      |
| Ca1       | 1.25(1)  | 1.25(1)  | 0.53(2)   | 0.63(1)  | 0        | 0        | 1.02 |      |
| Ca2       | 0.95(2)  | 1.10(2)  | 0.82(1)   | 0.55(2)  | 0        | 0        | 0.96 |      |
| P         | 0.50(3)  | 0.59(2)  | 0.62(2)   | 0.31(2)  | 0        | 0        | 0.56 |      |
| F         | 1.35(6)  | 1.35(6)  | 6.42(14)  | 0.68(3)  | 0        | 0        | 3.05 | 4.76 |
| O1        | 1.31(7)  | 1.71(7)  | 1.63(7)   | 1.21(6)  | 0        | 0        | 1.41 |      |
| O2        | 1.00(6)  | 0.65(7)  | 3.02(9)   | 0.22(5)  | 0        | 0        | 1.60 |      |
| O3        | 1.86(5)  | 3.31(6)  | 0.93(4)   | 1.70(5)  | -0.48(4) | -0.73(4) | 2.04 |      |
| Sample 17 |          |          |           |          |          |          |      |      |
| Ca1       | 1.11(1)  | 1.11(1)  | 0.38(2)   | 0.56(1)  | 0        | 0        | 0.87 |      |
| Ca2       | 0.80(2)  | 0.96(2)  | 0.71(1)   | 0.40(2)  | 0        | 0        | 0.86 |      |
| P         | 0.40(2)  | 0.56(2)  | 0.40(2)   | 0.35(2)  | 0        | 0        | 0.43 |      |
| F         | 1.28(6)  | 1.28(6)  | 5.97(13)  | 0.64(3)  | 0        | 0        | 2.86 | 4.66 |
| O1        | 1.03(7)  | 1.25(6)  | 0.99(6)   | 0.83(6)  | 0        | 0        | 1.01 |      |
| O2        | 0.85(6)  | 0.68(7)  | 2.78(8)   | 0.20(5)  | 0        | 0        | 1.50 |      |
| O3        | 1.21(4)  | 3.21(6)  | 0.38(4)   | 1.38(4)  | -0.30(3) | -0.65(4) | 1.72 |      |
| Sample 18 |          |          |           |          |          |          |      |      |
| Ca1       | 1.03(1)  | 1.03(1)  | 0.43(1)   | 0.52(1)  | 0        | 0        | 0.84 |      |
| Ca2       | 0.75(1)  | 1.02(1)  | 0.55(1)   | 0.39(1)  | 0        | 0        | 0.83 |      |
| P         | 0.31(1)  | 0.48(1)  | 0.30(1)   | 0.23(1)  | 0        | 0        | 0.37 |      |
| F         | 1.12(4)  | 1.12(4)  | 6.79(11)  | 0.56(2)  | 0        | 0        | 3.02 | 6.06 |
| O1        | 1.39(5)  | 1.71(5)  | 1.56(4)   | 1.28(4)  | 0        | 0        | 1.38 |      |
| O2        | 0.70(4)  | 0.46(4)  | 2.43(5)   | -0.07(3) | 0        | 0        | 1.33 |      |
| O3        | 1.70(3)  | 3.55(4)  | 0.63(3)   | 1.76(3)  | -0.54(2) | -0.84(3) | 1.99 |      |
| Sample 19 |          |          |           |          |          |          |      |      |
| Ca1       | 1.09(1)  | 1.09(1)  | 0.52(2)   | 0.54(1)  | 0        | 0        | 0.91 |      |
| Ca2       | 0.75(2)  | 0.97(2)  | 0.69(2)   | 0.40(2)  | 0        | 0        | 0.85 |      |
| P         | 0.39(3)  | 0.39(2)  | 0.40(2)   | 0.25(2)  | 0        | 0        | 0.37 |      |
| F         | 1.66(7)  | 1.66(7)  | 7.22(16)  | 0.83(3)  | 0        | 0        | 3.53 | 4.35 |
| O1        | 1.20(8)  | 1.56(7)  | 1.26(7)   | 1.07(6)  | 0        | 0        | 1.23 |      |
| O2        | 1.30(7)  | 0.74(7)  | 2.53(8)   | 0.52(6)  | 0        | 0        | 1.46 |      |
| O3        | 1.54(5)  | 3.01(6)  | 0.93(4)   | 1.40(5)  | -0.58(4) | -0.79(4) | 1.89 |      |
| Sample 20 |          |          |           |          |          |          |      |      |
| Ca1       | 0.77(2)  | 0.77(2)  | 0.53(3)   | -0.87(1) | 0        | 0        | 1.23 |      |
| Ca2       | 0.73(3)  | 1.19(3)  | 0.80(2)   | -0.24(3) | 0        | 0        | 1.28 |      |
| P         | 0.44(4)  | 0.54(4)  | 0.48(3)   | -0.41(3) | 0        | 0        | 0.78 |      |
| F         | 0.82(9)  | 0.82(9)  | 7.70(25)  | -0.84(5) | 0        | 0        | 3.66 | 9.39 |
| O1        | 1.42(12) | 1.65(11) | 2.03(12)  | 1.44(10) | 0        | 0        | 1.45 |      |
| O2        | 1.05(11) | 0.81(11) | 2.38(13)  | 0.35(9)  | 0        | 0        | 1.44 |      |
| O3        | 1.41(7)  | 3.26(10) | 0.92(7)   | 1.49(7)  | -0.29(6) | -0.81(6) | 1.95 |      |
| Sample 21 |          |          |           |          |          |          |      |      |
| Ca1       | 1.10(2)  | 1.10(2)  | 0.46(3)   | 0.55(1)  | 0        | 0        | 0.90 |      |
| Ca2       | 0.72(2)  | 1.15(3)  | 0.85(2)   | 0.33(2)  | 0        | 0        | 1.02 |      |
| P         | 0.42(3)  | 0.57(3)  | 0.46(3)   | 0.24(3)  | 0        | 0        | 0.51 |      |
| F         | 1.72(8)  | 1.72(8)  | 11.64(25) | 0.86(4)  | 0        | 0        | 5.04 | 6.77 |
| O1        | 1.40(10) | 1.91(9)  | 1.43(9)   | 1.33(8)  | 0        | 0        | 1.43 |      |
| O2        | 1.21(9)  | 0.93(9)  | 2.56(11)  | 0.59(7)  | 0        | 0        | 1.52 |      |
| O3        | 1.54(6)  | 3.41(8)  | 1.13(6)   | 1.66(6)  | -0.56(5) | -0.99(5) | 2.07 |      |
| Sample 22 |          |          |           |          |          |          |      |      |
| Ca1       | 1.10(1)  | 1.10(1)  | 0.45(2)   | 0.55(1)  | 0        | 0        | 0.89 |      |
| Ca2       | 0.83(2)  | 0.85(2)  | 0.78(1)   | 0.42(2)  | 0        | 0        | 0.83 |      |
| P         | 0.31(2)  | 0.63(2)  | 0.32(2)   | 0.36(2)  | 0        | 0        | 0.40 |      |

|            |          |          |           |           |          |          |      |       |
|------------|----------|----------|-----------|-----------|----------|----------|------|-------|
| F          | 1.93(7)  | 1.93(7)  | 10.80(20) | 0.96(4)   | 0        | 0        | 4.90 | 5.60  |
| O1         | 1.05(7)  | 1.92(7)  | 2.05(7)   | 1.16(6)   | 0        | 0        | 1.60 |       |
| O2         | 0.56(6)  | 0.82(7)  | 2.58(8)   | -0.24(5)  | 0        | 0        | 1.61 |       |
| O3         | 1.67(5)  | 3.96(6)  | 0.66(4)   | 1.87(5)   | -0.68(4) | -1.18(4) | 2.17 |       |
| Sample 23  |          |          |           |           |          |          |      |       |
| Ca1        | 0.89(2)  | 0.89(2)  | 0.63(2)   | 0.44(1)   | 0        | 0        | 0.81 |       |
| Ca2        | 0.74(2)  | 0.99(2)  | 0.78(2)   | 0.38(2)   | 0        | 0        | 0.89 |       |
| P          | 0.29(3)  | 0.50(3)  | 0.44(3)   | 0.24(2)   | 0        | 0        | 0.42 |       |
| F          | 1.63(8)  | 1.63(8)  | 13.79(25) | 0.82(4)   | 0        | 0        | 5.70 | 8.46  |
| O1         | 1.14(9)  | 1.34(8)  | 1.63(8)   | 1.13(7)   | 0        | 0        | 1.18 |       |
| O2         | 0.86(8)  | 0.44(8)  | 2.75(10)  | 0.17(6)   | 0        | 0        | 1.37 |       |
| O3         | 1.25(6)  | 3.16(7)  | 1.21(5)   | 1.27(5)   | -0.60(4) | -0.66(5) | 2.03 |       |
| Sample 24  |          |          |           |           |          |          |      |       |
| Ca1        | 1.18(1)  | 1.18(1)  | 0.53(2)   | 0.59(1)   | 0        | 0        | 0.97 |       |
| Ca2        | 0.92(2)  | 1.14(2)  | 0.83(1)   | 0.48(2)   | 0        | 0        | 1.01 |       |
| P          | 0.45(2)  | 0.63(2)  | 0.44(2)   | 0.31(2)   | 0        | 0        | 0.51 |       |
| F          | 1.98(7)  | 1.98(7)  | 11.41(19) | 0.99(3)   | 0        | 0        | 5.14 | 5.76  |
| O1         | 1.00(7)  | 1.75(7)  | 1.53(7)   | 1.20(6)   | 0        | 0        | 1.30 |       |
| O2         | 1.07(6)  | 0.66(7)  | 2.92(8)   | 0.31(5)   | 0        | 0        | 1.56 |       |
| O3         | 2.01(5)  | 3.88(6)  | 1.18(4)   | 2.08(5)   | -0.79(4) | -0.93(4) | 2.32 |       |
| Sample 25  |          |          |           |           |          |          |      |       |
| Ca1        | 1.13(1)  | 1.13(1)  | 0.53(2)   | 0.57(1)   | 0        | 0        | 0.94 |       |
| Ca2        | 0.83(2)  | 1.11(2)  | 0.63(1)   | 0.42(2)   | 0        | 0        | 0.93 |       |
| P          | 0.47(2)  | 0.49(2)  | 0.43(2)   | 0.29(2)   | 0        | 0        | 0.44 |       |
| F          | 1.41(6)  | 1.41(6)  | 12.65(20) | 0.71(3)   | 0        | 0        | 5.17 | 8.97  |
| O1         | 1.38(7)  | 1.51(7)  | 1.17(6)   | 1.31(6)   | 0        | 0        | 1.13 |       |
| O2         | 0.74(6)  | 0.73(7)  | 2.80(8)   | 0.26(5)   | 0        | 0        | 1.48 |       |
| O3         | 1.51(5)  | 2.96(6)  | 0.75(4)   | 1.41(4)   | -0.61(4) | -0.81(4) | 1.79 |       |
| Sample 26  |          |          |           |           |          |          |      |       |
| Ca1        | 1.07(2)  | 1.07(2)  | 0.43(2)   | 0.53(1)   | 0        | 0        | 0.86 |       |
| Ca2        | 0.77(2)  | 1.26(2)  | 0.59(1)   | 0.39(2)   | 0        | 0        | 0.99 |       |
| P          | 0.38(3)  | 0.56(3)  | 0.40(2)   | 0.26(2)   | 0        | 0        | 0.46 |       |
| F          | 1.35(7)  | 1.35(7)  | 17.15(23) | 0.674(34) | 0        | 0        | 6.62 | 12.70 |
| O1         | 1.31(8)  | 1.82(8)  | 1.19(7)   | 1.33(7)   | 0        | 0        | 1.27 |       |
| O2         | 1.10(7)  | 0.70(7)  | 2.32(8)   | 0.45(6)   | 0        | 0        | 1.33 |       |
| O3         | 1.59(5)  | 3.06(6)  | 0.96(4)   | 1.48(5)   | -0.59(4) | -0.96(4) | 1.91 |       |
| Sample 27  |          |          |           |           |          |          |      |       |
| Ca1        | 1.06(2)  | 1.06(2)  | 0.62(2)   | 0.53(1)   | 0        | 0        | 0.92 |       |
| Ca2        | 0.91(2)  | 1.26(2)  | 0.78(2)   | 0.37(2)   | 0        | 0        | 1.11 |       |
| P          | 0.35(3)  | 0.63(3)  | 0.45(3)   | 0.31(2)   | 0        | 0        | 0.48 |       |
| F          | 1.51(8)  | 1.51(8)  | 16.50(26) | 0.76(4)   | 0        | 0        | 6.52 | 10.93 |
| O1         | 1.25(8)  | 1.43(8)  | 2.02(8)   | 1.04(7)   | 0        | 0        | 1.44 |       |
| O2         | 0.85(8)  | 0.89(8)  | 3.56(10)  | 0.52(6)   | 0        | 0        | 1.74 |       |
| O3         | 2.00(6)  | 3.50(7)  | 0.59(5)   | 1.57(5)   | -0.39(4) | -0.48(4) | 2.13 |       |
| Sample 28  |          |          |           |           |          |          |      |       |
| Ca1        | 0.60(3)  | 0.60(3)  | 0.65(3)   | 0.30(1)   | 0        | 0        | 0.62 |       |
| Ca2        | 0.58(3)  | 0.77(3)  | 0.96(2)   | 0.31(3)   | 0        | 0        | 0.81 |       |
| P          | 0.31(5)  | 0.32(4)  | 0.36(4)   | 0.35(4)   | 0        | 0        | 0.25 |       |
| F          | 1.04(12) | 1.04(12) | 20.6(4)   | 0.52(6)   | 0        | 0        | 7.55 | 19.81 |
| O1         | 0.26(12) | 1.55(12) | 1.61(11)  | 1.40(11)  | 0        | 0        | 0.88 |       |
| O2         | 1.43(12) | 0.46(12) | 3.00(13)  | 0.61(10)  | 0        | 0        | 1.47 |       |
| O3         | 0.91(8)  | 2.53(9)  | 1.07(7)   | 1.32(7)   | -0.56(6) | -0.35(6) | 1.50 |       |
| Sample 29a |          |          |           |           |          |          |      |       |

|            |          |           |           |          |           |           |      |       |
|------------|----------|-----------|-----------|----------|-----------|-----------|------|-------|
| Ca1        | 1.00(3)  | 1.00(3)   | 0.23(5)   | 0.50(1)  | 0         | 0         | 0.75 |       |
| Ca2        | 0.77(3)  | 1.25(4)   | 0.23(4)   | 0.40(3)  | 0         | 0         | 0.85 |       |
| P          | 0.39(5)  | 0.60(4)   | 0.07(5)   | 0.33(3)  | 0         | 0         | 0.35 |       |
| F          | 0.97(11) | 0.97(11)  | 23.9(6)   | 0.49(6)  | 0         | 0         | 8.61 | 24.64 |
| O1         | 1.25(13) | 1.64(12)  | 1.17(18)  | 1.40(11) | 0         | 0         | 1.12 |       |
| O2         | 1.10(11) | 0.77(12)  | 1.53(19)  | 0.48(9)  | 0         | 0         | 1.10 |       |
| O3         | 1.71(9)  | 3.39(11)  | 0.10(9)   | 1.47(8)  | -0.82(7)  | -1.04(8)  | 1.85 |       |
| Sample 29b |          |           |           |          |           |           |      |       |
| Ca1        | 1.01(4)  | 1.01(4)   | 0.73(6)   | 0.50(2)  | 0         | 0         | 0.92 |       |
| Ca2        | 0.70(4)  | 1.30(5)   | 1.08(5)   | 0.37(4)  | 0         | 0         | 1.16 |       |
| P          | 0.32(6)  | 0.40(6)   | 0.57(8)   | 0.23(5)  | 0         | 0         | 0.42 |       |
| F          | 1.96(16) | 1.96(16)  | 12.8(5)   | 0.98(8)  | 0         | 0         | 5.60 | 6.53  |
| O1         | 1.11(17) | 1.71(17)  | 0.94(21)  | 1.12(15) | 0         | 0         | 1.15 |       |
| O2         | 1.83(17) | 0.38(16)  | 2.79(26)  | 0.63(13) | 0         | 0         | 1.48 |       |
| O3         | 1.10(11) | 3.40(14)  | 2.01(14)  | 1.51(11) | -0.54(10) | -0.84(11) | 2.28 |       |
| Sample 30a |          |           |           |          |           |           |      |       |
| Ca1        | 1.06(1)  | 1.06(1)   | 0.62(2)   | 0.53(1)  | 0         | 0         | 0.92 |       |
| Ca2        | 1.19(2)  | 1.48(2)   | 0.94(1)   | 0.66(2)  | 0         | 0         | 1.25 |       |
| P          | 0.74(3)  | 0.67(2)   | 0.69(2)   | 0.40(2)  | 0         | 0         | 0.68 |       |
| Cl         | 1.55(4)  | 1.55(4)   | 5.91(10)  | 0.78(2)  | 0         | 0         | 3.01 | 3.81  |
| O1         | 1.99(7)  | 2.95(8)   | 1.79(7)   | 2.29(7)  | 0         | 0         | 1.91 |       |
| O2         | 1.03(6)  | 0.92(6)   | 2.85(7)   | 0.26(5)  | 0         | 0         | 1.69 |       |
| O3         | 2.98(6)  | 3.87(6)   | 1.44(4)   | 2.57(5)  | -1.21(4)  | -1.28(4)  | 2.51 |       |
| Sample 31a |          |           |           |          |           |           |      |       |
| Ca1        | 1.24(2)  | 1.24(2)   | 0.40(3)   | 0.62(1)  | 0         | 0         | 0.96 |       |
| Ca2        | 0.89(3)  | 0.98(3)   | 0.98(2)   | 0.46(3)  | 0         | 0         | 0.97 |       |
| P          | 1.26(5)  | 1.44(4)   | 1.11(4)   | 0.75(4)  | 0         | 0         | 1.26 |       |
| F          | 1.52(10) | 1.52(10)  | 13.06(28) | 0.76(5)  | 0         | 0         | 5.38 | 8.59  |
| O1         | 0.00(10) | 1.74(11)  | 0.67(10)  | 1.37(9)  | 0         | 0         | 0.60 |       |
| O2         | 0.05(9)  | -0.44(10) | 1.79(12)  | -0.29(8) | 0         | 0         | 0.49 |       |
| O3         | 1.50(7)  | 4.57(10)  | 0.26(6)   | 2.38(7)  | -0.75(6)  | -1.35(6)  | 2.10 |       |
| Sample 32  |          |           |           |          |           |           |      |       |
| Ca1        | 1.09(1)  | 1.09(1)   | 0.54(2)   | 0.55(1)  | 0         | 0         | 0.91 |       |
| Ca2        | 1.22(2)  | 1.34(2)   | 0.75(2)   | 0.56(2)  | 0         | 0         | 1.16 |       |
| P          | 0.66(3)  | 0.74(2)   | 0.41(2)   | 0.38(2)  | 0         | 0         | 0.60 |       |
| Cl         | 1.92(4)  | 1.92(4)   | 6.45(11)  | 0.96(2)  | 0         | 0         | 3.44 | 3.36  |
| O1         | 2.22(8)  | 2.13(7)   | 1.51(7)   | 1.85(7)  | 0         | 0         | 1.63 |       |
| O2         | 1.38(7)  | 0.65(7)   | 2.30(7)   | 0.15(6)  | 0         | 0         | 1.52 |       |
| O3         | 1.92(5)  | 3.91(6)   | 1.44(4)   | 1.87(5)  | -1.19(4)  | -1.69(4)  | 2.49 |       |



Table S4. Continued.

|                |     | 8b         | 9         | 10         | 11         | 12        | 13         | 14        | 15         | 16        |
|----------------|-----|------------|-----------|------------|------------|-----------|------------|-----------|------------|-----------|
| Ca1-O1/Å       | × 3 | 2.3971(22) | 2.4001(6) | 2.3973(7)  | 2.4011(7)  | 2.4013(6) | 2.3971(7)  | 2.4005(6) | 2.4032(8)  | 2.4034(8) |
| Ca1-O2/Å       | × 3 | 2.4274(32) | 2.4523(6) | 2.4494(7)  | 2.4543(8)  | 2.4511(7) | 2.4492(8)  | 2.4523(6) | 2.4508(9)  | 2.4560(8) |
| <Ca1-O>[6]/Å   |     | 2.4123     | 2.4262    | 2.4234     | 2.4277     | 2.4262    | 2.4232     | 2.4264    | 2.4270     | 2.4297    |
| Ca1-O3/Å       | × 3 | 2.8652(28) | 2.8076(6) | 2.8085(7)  | 2.8098(7)  | 2.8060(6) | 2.8072(7)  | 2.8101(6) | 2.8134(8)  | 2.8075(8) |
| <Ca1-O>[9]/Å   |     | 2.5632     | 2.5533    | 2.5517     | 2.5551     | 2.5528    | 2.5512     | 2.5543    | 2.5558     | 2.5556    |
| Ca2-X/Å        | × 1 | 2.3031(14) | 2.3027(2) | 2.2980(3)  | 2.2930(3)  | 2.2964(2) | 2.2993(3)  | 2.3016(2) | 2.2969(3)  | 2.2945(3) |
| Ca2-O1/Å       | × 1 | 2.683(5)   | 2.6880(8) | 2.6894(10) | 2.6857(10) | 2.6901(9) | 2.6928(11) | 2.6898(8) | 2.6868(11) | 2.685(1)  |
| Ca2-O2/Å       | × 1 | 2.411(4)   | 2.3713(8) | 2.3767(9)  | 2.3842(10) | 2.3824(8) | 2.3778(10) | 2.3746(8) | 2.3869(11) | 2.384(1)  |
| Ca2-O3/Å       | × 2 | 2.4765(31) | 2.4883(6) | 2.4882(7)  | 2.4862(7)  | 2.4918(6) | 2.4896(8)  | 2.4893(6) | 2.4932(8)  | 2.4970(8) |
| Ca2-O3/Å       | × 2 | 2.3449(18) | 2.3521(5) | 2.3516(6)  | 2.3547(7)  | 2.3528(6) | 2.3517(6)  | 2.3516(5) | 2.3503(7)  | 2.3549(7) |
| <Ca2-O>[6]/Å   |     | 2.4561     | 2.4567    | 2.4576     | 2.4586     | 2.4603    | 2.4589     | 2.4577    | 2.4601     | 2.4621    |
| <Ca2-O,X>[7]/Å |     | 2.4343     | 2.4347    | 2.4348     | 2.4350     | 2.4369    | 2.4361     | 2.4354    | 2.4368     | 2.4382    |
| P-O1/Å         | × 1 | 1.5345(9)  | 1.5332(8) | 1.5343(9)  | 1.5284(10) | 1.5301(8) | 1.5364(10) | 1.5349(8) | 1.531(1)   | 1.530(1)  |
| P-O2/Å         | × 1 | 1.5361(9)  | 1.5394(7) | 1.5421(9)  | 1.5317(10) | 1.5368(8) | 1.5431(10) | 1.5423(7) | 1.5352(11) | 1.537(1)  |
| P-O3/Å         | × 2 | 1.5337(7)  | 1.5303(6) | 1.5325(7)  | 1.5364(7)  | 1.5334(6) | 1.5336(7)  | 1.5351(5) | 1.5368(8)  | 1.5346(8) |
| <P-O>[4]/Å     |     | 1.5345     | 1.5333    | 1.5354     | 1.5332     | 1.5334    | 1.5367     | 1.5369    | 1.5349     | 1.5342    |
| O1-P-O2/°      | × 1 | 112.7(3)   | 111.32(5) | 111.39(6)  | 111.46(6)  | 111.30(5) | 111.36(6)  | 111.24(5) | 111.81(7)  | 111.53(7) |
| O1-P-O3/°      | × 2 | 109.8(2)   | 110.96(3) | 111.00(3)  | 111.09(4)  | 111.04(3) | 111.10(4)  | 111.01(3) | 110.74(4)  | 110.93(4) |
| O2-P-O3/°      | × 2 | 109.5(2)   | 108.15(3) | 108.09(4)  | 108.29(4)  | 108.07(3) | 107.98(4)  | 108.23(3) | 108.18(4)  | 108.04(4) |
| O3-P-O3/°      | × 1 | 105.2(2)   | 107.14(5) | 107.10(6)  | 106.43(6)  | 107.16(5) | 107.15(6)  | 106.96(5) | 107.02(7)  | 107.19(6) |
| <O-P-O>[6]/°   |     | 109.43     | 109.45    | 109.45     | 109.44     | 109.45    | 109.45     | 109.45    | 109.45     | 109.44    |



Table S4. Continued.

|                |     | 17         | 18        | 19         | 20         | 21         | 22         | 23         | 24         | 25         |
|----------------|-----|------------|-----------|------------|------------|------------|------------|------------|------------|------------|
| Ca1-O1/Å       | × 3 | 2.3985(7)  | 2.4033(6) | 2.4035(8)  | 2.4090(12) | 2.4026(10) | 2.3991(8)  | 2.3995(9)  | 2.4068(7)  | 2.4055(8)  |
| Ca1-O2/Å       | × 3 | 2.4529(8)  | 2.4566(6) | 2.4550(9)  | 2.4547(13) | 2.4526(11) | 2.4639(9)  | 2.4570(10) | 2.4607(8)  | 2.4560(8)  |
| <Ca1-O>[6]/Å   |     | 2.4257     | 2.4300    | 2.4293     | 2.4319     | 2.4276     | 2.4315     | 2.4283     | 2.4338     | 2.4308     |
| Ca1-O3/Å       | × 3 | 2.8132(7)  | 2.8110(6) | 2.8140(8)  | 2.8133(12) | 2.8151(10) | 2.8095(8)  | 2.8132(9)  | 2.8109(8)  | 2.8090(8)  |
| <Ca1-O>[9]/Å   |     | 2.5549     | 2.5570    | 2.5575     | 2.5590     | 2.5568     | 2.5575     | 2.5566     | 2.5595     | 2.5568     |
| Ca2-X/Å        | × 1 | 2.3099(3)  | 2.3093(2) | 2.3158(3)  | 2.3140(5)  | 2.3228(4)  | 2.3170(3)  | 2.3296(4)  | 2.3182(3)  | 2.3295(3)  |
| Ca2-O1/Å       | × 1 | 2.6946(10) | 2.7002(8) | 2.6916(12) | 2.6976(18) | 2.7075(15) | 2.7067(12) | 2.7076(13) | 2.6944(11) | 2.7041(11) |
| Ca2-O2/Å       | × 1 | 2.3763(10) | 2.3720(7) | 2.3704(11) | 2.3721(17) | 2.3766(14) | 2.3738(11) | 2.3645(12) | 2.3742(10) | 2.3675(10) |
| Ca2-O3/Å       | × 2 | 2.4879(7)  | 2.4891(6) | 2.4958(9)  | 2.4869(13) | 2.4937(10) | 2.4939(8)  | 2.4994(10) | 2.4944(8)  | 2.4999(8)  |
| Ca2-O3/Å       | × 2 | 2.3572(6)  | 2.3547(5) | 2.3530(7)  | 2.3532(11) | 2.3491(9)  | 2.3583(7)  | 2.3503(8)  | 2.3552(7)  | 2.3483(7)  |
| <Ca2-O>[6]/Å   |     | 2.4602     | 2.4600    | 2.4599     | 2.4583     | 2.4616     | 2.4642     | 2.4619     | 2.4613     | 2.4613     |
| <Ca2-O,X>[7]/Å |     | 2.4387     | 2.4384    | 2.4393     | 2.4377     | 2.4418     | 2.4431     | 2.4430     | 2.4409     | 2.4425     |
| P-O1/Å         | × 1 | 1.5319(10) | 1.5355(7) | 1.5334(11) | 1.5282(17) | 1.5338(14) | 1.5397(11) | 1.5412(12) | 1.5344(10) | 1.5335(10) |
| P-O2/Å         | × 1 | 1.5396(9)  | 1.5362(7) | 1.5399(11) | 1.5369(16) | 1.5312(13) | 1.5289(11) | 1.5414(12) | 1.5339(10) | 1.5372(10) |
| P-O3/Å         | × 2 | 1.5310(7)  | 1.5329(5) | 1.5288(8)  | 1.5353(12) | 1.5367(10) | 1.5312(8)  | 1.5317(9)  | 1.5374(7)  | 1.5358(7)  |
| <P-O>[4]/Å     |     | 1.5334     | 1.5344    | 1.5327     | 1.5339     | 1.5346     | 1.5328     | 1.5365     | 1.5358     | 1.5356     |
| O1-P-O2/°      | × 1 | 111.75(6)  | 110.97(5) | 111.32(7)  | 111.37(10) | 111.36(8)  | 110.56(7)  | 110.82(8)  | 111.31(6)  | 111.36(6)  |
| O1-P-O3/°      | × 2 | 111.02(4)  | 111.14(3) | 110.91(4)  | 111.16(6)  | 111.09(5)  | 111.47(4)  | 111.24(5)  | 111.18(4)  | 111.14(4)  |
| O2-P-O3/°      | × 2 | 108.13(4)  | 108.45(3) | 108.22(4)  | 108.30(7)  | 108.22(5)  | 108.23(4)  | 108.22(5)  | 108.27(4)  | 107.93(4)  |
| O3-P-O3/°      | × 1 | 106.58(6)  | 106.53(5) | 107.10(7)  | 106.34(10) | 106.68(8)  | 106.72(6)  | 106.94(8)  | 106.43(6)  | 107.16(6)  |
| <O-P-O>[6]/°   |     | 109.44     | 109.45    | 109.45     | 109.44     | 109.44     | 109.45     | 109.45     | 109.44     | 109.44     |

Table S4. Continued.

|                |     | 26         | 27         | 28         | 29a        | 29b        | 30a (Cl)   | 30b (OH)   | 31a (F)    | 31b (OH)   |
|----------------|-----|------------|------------|------------|------------|------------|------------|------------|------------|------------|
| Ca1-O1/Å       | × 3 | 2.4070(8)  | 2.3991(9)  | 2.3874(10) | 2.4070(15) | 2.4030(19) | 2.3999(7)  | 2.446(4)   | 2.4006(12) | 2.382(7)   |
| Ca1-O2/Å       | × 3 | 2.4511(8)  | 2.4571(9)  | 2.4606(11) | 2.4493(17) | 2.4615(21) | 2.4404(8)  | 2.461(6)   | 2.4563(13) | 2.456(9)   |
| <Ca1-O>[6]/Å   |     | 2.4291     | 2.4281     | 2.4240     | 2.4282     | 2.4323     | 2.42015    | 2.4535     | 2.4285     | 2.419      |
| Ca1-O3/Å       | × 3 | 2.8160(8)  | 2.8129(9)  | 2.8103(11) | 2.8062(15) | 2.8264(19) | 2.7915(7)  | 2.892(5)   | 2.8022(12) | 2.792(8)   |
| <Ca1-O>[9]/Å   |     | 2.5580     | 2.5564     | 2.5528     | 2.5542     | 2.5636     | 2.5439     | 2.5997     | 2.5530     | 2.5433     |
| Ca2-X/Å        | × 1 | 2.3350(3)  | 2.3338(4)  | 2.3486(5)  | 2.3324(6)  | 2.3477(7)  | 2.7718(5)  | 2.439(4)   | 2.3162(5)  | 2.3507(32) |
| Ca2-O1/Å       | × 1 | 2.7115(11) | 2.7182(13) | 2.7220(16) | 2.7121(20) | 2.7195(25) | 2.9384(11) | 2.736(8)   | 2.7013(16) | 2.671(10)  |
| Ca2-O2/Å       | × 1 | 2.3695(10) | 2.3713(12) | 2.3729(15) | 2.3722(19) | 2.3581(24) | 2.3282(9)  | 2.329(7)   | 2.3640(15) | 2.361(9)   |
| Ca2-O3/Å       | × 2 | 2.5016(8)  | 2.4976(9)  | 2.5125(11) | 2.4974(16) | 2.5055(20) | 2.5366(8)  | 2.449(6)   | 2.5038(14) | 2.535(10)  |
| Ca2-O3/Å       | × 2 | 2.3447(7)  | 2.3526(8)  | 2.3369(10) | 2.3508(16) | 2.3429(20) | 2.3347(7)  | 2.359(4)   | 2.3352(10) | 2.357(6)   |
| <Ca2-O>[6]/Å   |     | 2.4623     | 2.4650     | 2.4656     | 2.4635     | 2.4624     | 2.5015     | 2.4468     | 2.4572     | 2.4693     |
| <Ca2-O,X>[7]/Å |     | 2.4441     | 2.4462     | 2.4489     | 2.4447     | 2.4460     | 2.5401     | 2.4457     | 2.4371     | 2.4524     |
| P-O1/Å         | × 1 | 1.5314(11) | 1.5443(12) | 1.5706(15) | 1.5332(18) | 1.5323(24) | 1.5458(10) | 1.5294(14) | 1.5230(15) | 1.5296(12) |
| P-O2/Å         | × 1 | 1.5397(10) | 1.5314(12) | 1.5161(15) | 1.5422(18) | 1.5389(23) | 1.5328(10) | 1.5294(14) | 1.5206(14) | 1.5295(12) |
| P-O3/Å         | × 2 | 1.5360(7)  | 1.5287(9)  | 1.5320(10) | 1.5343(16) | 1.5325(20) | 1.5336(7)  | 1.5319(10) | 1.5461(10) | 1.5307(9)  |
| <P-O>[4]/Å     |     | 1.5358     | 1.5333     | 1.5377     | 1.5360     | 1.5341     | 1.5365     | 1.5307     | 1.5340     | 1.5301     |
| O1-P-O2/°      | × 1 | 111.31(7)  | 110.70(7)  | 110.22(9)  | 111.18(12) | 110.95(15) | 111.02(6)  | 110.4(5)   | 110.7(1)   | 114.7(6)   |
| O1-P-O3/°      | × 2 | 111.09(4)  | 111.30(4)  | 110.70(6)  | 111.56(7)  | 110.87(9)  | 112.68(4)  | 109.9(4)   | 110.97(6)  | 110.6(4)   |
| O2-P-O3/°      | × 2 | 108.12(4)  | 108.22(5)  | 108.21(6)  | 107.74(8)  | 108.54(10) | 106.40(4)  | 112.2(3)   | 108.20(7)  | 106.9(4)   |
| O3-P-O3/°      | × 1 | 106.94(6)  | 106.94(7)  | 108.72(9)  | 106.83(13) | 106.95(17) | 107.25(6)  | 102.0(5)   | 107.7(1)   | 106.6(8)   |
| <O-P-O>[6]/°   |     | 109.45     | 109.45     | 109.46     | 109.44     | 109.45     | 109.41     | 109.42     | 109.45     | 109.38     |

In sample 30a, Cl-Cl = 0.886(2), 2.503(2), and 3.3887(1) Å. In sample 32, Cl-Cl = 0.926(2), 2.466(2), and 3.3916(1) Å. In sample 4b, OH-OH = 0.31(2) Å. In sample 30b, OH-OH = 0.77(4) Å.

Table S4. Continued.

|                |     | 32         | 33a (F)    | 33b (F)    | 33c (F)    |
|----------------|-----|------------|------------|------------|------------|
| Ca1-O1/Å       | × 3 | 2.4165(7)  | 2.3897(12) | 2.3937(29) | 2.3797(25) |
| Ca1-O2/Å       | × 3 | 2.4473(8)  | 2.4475(16) | 2.458(4)   | 2.4415(34) |
| <Ca1-O>[6]/Å   |     | 2.4319     | 2.4186     | 2.42585    | 2.4106     |
| Ca1-O3/Å       | × 3 | 2.8008(8)  | 2.8152(15) | 2.800(4)   | 2.8110(32) |
| <Ca1-O>[9]/Å   |     | 2.5549     | 2.5508     | 2.5506     | 2.5441     |
| Ca2-X/Å        | × 1 | 2.7618(6)  | 2.3027(6)  | 2.2973(17) | 2.2963(13) |
| Ca2-O1/Å       | × 1 | 2.9304(11) | 2.6929(22) | 2.688(6)   | 2.685(5)   |
| Ca2-O2/Å       | × 1 | 2.3114(9)  | 2.3713(20) | 2.375(5)   | 2.382(4)   |
| Ca2-O3/Å       | × 2 | 2.5411(8)  | 2.4773(16) | 2.482(4)   | 2.476(4)   |
| Ca2-O3/Å       | × 2 | 2.3333(7)  | 2.3479(11) | 2.3619(27) | 2.3456(23) |
| <Ca2-O>[6]/Å   |     | 2.4984     | 2.4524     | 2.4585     | 2.4517     |
| <Ca2-O,X>[7]/Å |     | 2.5361     | 2.4310     | 2.4354     | 2.4295     |
| P-O1/Å         | × 1 | 1.5230(11) | 1.5367(13) | 1.5359(19) | 1.5317(18) |
| P-O2/Å         | × 1 | 1.5407(10) | 1.5441(12) | 1.5340(19) | 1.5348(18) |
| P-O3/Å         | × 2 | 1.5334(7)  | 1.5379(9)  | 1.5318(13) | 1.5325(13) |
| <P-O>[4]/Å     |     | 1.5326     | 1.5392     | 1.5334     | 1.5329     |
| O1-P-O2/°      | × 1 | 111.01(6)  | 111.4(1)   | 111.4(4)   | 112.8(3)   |
| O1-P-O3/°      | × 2 | 112.21(4)  | 111.31(7)  | 111.5(2)   | 111.3(2)   |
| O2-P-O3/°      | × 2 | 106.94(4)  | 108.30(8)  | 108.1(2)   | 107.7(2)   |
| O3-P-O3/°      | × 1 | 107.23(7)  | 106.0(1)   | 106.2(3)   | 105.7(3)   |
| <O-P-O>[6]/°   |     | 109.42     | 109.44     | 109.45     | 109.42     |

**Table S5.** Information for some apatite samples from the literature, which are included in some Figures below for comparison to data from this study.

| Group | Locality                                                  | Composition                                                                                                                                                                                | Reference             |
|-------|-----------------------------------------------------------|--------------------------------------------------------------------------------------------------------------------------------------------------------------------------------------------|-----------------------|
| 1     | Four synthetic samples                                    | $\text{Ca}_5[\text{PO}_4]_3(\text{F}_{0.5}\text{Cl}_{0.5})\Sigma 1.00$                                                                                                                     | Hughes et al. [36]    |
| 2a    | Durango, Mexico                                           | $\{\text{Ca}_{4.90}\text{Fe}_{0.01}\text{Sr}_{0.01}\text{Ce}_{0.02}\}\Sigma 4.94[\text{P}_{2.96}\text{Si}_{0.02}\text{S}_{0.03}\text{O}_{12}](\text{F}_{0.94}\text{Cl}_{0.08})\Sigma 1.02$ | Hughes et al. [20]    |
| 2b    | Holly Springs, Georgia                                    | $\text{Ca}_{4.98}[\text{P}_{2.99}\text{O}_{12}](\text{F}_{0.06}\text{Cl}_{0.03}\text{OH}_{0.91})\Sigma 1.00$                                                                               | Hughes et al. [20]    |
| 2c    | Kragero, Norway                                           | $\{\text{Ca}_{4.98}\text{Fe}_{0.01}\text{Na}_{0.08}\text{Ce}_{0.01}\}\Sigma 4.98[\text{P}_{3.01}\text{O}_{12}](\text{F}_{0.09}\text{Cl}_{0.88})\Sigma 0.97$                                | Hughes et al. [20]    |
| 3     | Gunnison Formation, Jackson Peak, SW Utah                 | $\text{Ca}_5[\text{PO}_4]_3(\text{F}_{0.39}\text{Cl}_{0.33}\text{OH}_{0.28})\Sigma 1.00$                                                                                                   | Hughes et al. [37]    |
| 4a    | Branchville, Connecticut ( $\text{Mn}_{1.21}$ )           | $\{\text{Ca}_{4.41}\text{Mn}_{0.5}\text{Fe}_{0.05}\text{Na}_{0.04}\text{Ce}_{0.01}\}\Sigma 5.00[\text{P}_3\text{O}_{12}](\text{F}_{0.74}\text{OH}_{0.26})$                                 | Hughes et al. [38]    |
| 4b    | Harding pegmatite, Taos County, NM ( $\text{Mn}_{0.42}$ ) | $\{\text{Ca}_{4.80}\text{Mn}_{0.21}\text{Sr}_{0.01}\text{Na}_{0.01}\text{Ce}_{0.01}\}\Sigma 5.01[\text{P}_{2.99}\text{O}_{12}](\text{F}_{0.93}\text{OH}_{0.07})$                           | Hughes et al. [38]    |
| 4c    | Kola Peninsula ( $\text{Sr}_{0.63}$ )                     | $\{\text{Ca}_{4.77}\text{Sr}_{0.20}\text{Na}_{0.05}\text{Ce}_{0.03}\}\Sigma 5.04[\text{P}_{2.94}\text{Si}_{0.03}\text{O}_{12}]\text{F}_{1.09}$                                             | Hughes et al. [38]    |
| 4d    | Kola Peninsula ( $\text{Sr}_{0.63}$ )                     | $\{\text{Ca}_{4.88}\text{Sr}_{0.14}\text{Na}_{0.03}\text{Mn}_{0.01}\text{Ce}_{0.01}\}\Sigma 5.05[\text{P}_{2.93}\text{Si}_{0.02}\text{O}_{12}](\text{F}_{0.89}\text{OH}_{0.11})$           | Hughes et al. [38]    |
| 4e    | Lavozero Massif, Kola Peninsula                           | $\{\text{Ca}_{4.46}\text{Sr}_{0.55}\}[\text{P}_{2.93}\text{O}_6](\text{F}_{0.94}\text{OH}_{0.06})\Sigma 1.00$                                                                              | Rokovan & Hughes [40] |
| 4f    | Eibenstein an Der Thaya, Austria                          | $\{\text{Ca}_{4.28}\text{Mn}_{0.71}\text{Fe}_{0.01}\}\Sigma 4.99[\text{PO}_4]_3\text{F}_{1.00}$                                                                                            | Hughes et al. [39]    |

In the legends of Figures 8, group-1 contains four samples and is indicated by 1. syn (F,Cl)-Ap, group-2 by 2. (F,OH,Cl)-Ap, group-3 by 3. ter-(F,OH,Cl)-Ap, and group-4 by 4. (Sr,Mn)F-Ap.
